1 **A pleiotropic chemoreceptor facilitates the functional coupling of pheromone**  
2 **production and perception**

3

4 Cassondra Vernier<sup>1,2†</sup>, Kathleen M. Zelle<sup>1,†</sup>, Nicole Leitner<sup>1</sup>, Xitong Liang<sup>3</sup>, Sean  
5 Halloran<sup>4</sup>, Jocelyn G. Millar<sup>4</sup>, Yehuda Ben-Shahar<sup>1,5,\*</sup>

6

7 <sup>1</sup>Department of Biology, Washington University in Saint Louis, 1 Brookings Drive, Saint  
8 Louis, MO 63130, USA.

9 <sup>2</sup>Carl R. Woese Institute for Genomic Biology, University of Illinois, 1206 W. Gregory  
10 Dr., Urbana, IL 61801, USA

11 <sup>3</sup>Department of Neuroscience, Washington University School of Medicine, 660 South  
12 Euclid Avenue, St. Louis, MO 63110, USA

13 <sup>4</sup>Department of Entomology, University of California, Riverside, 900 University Avenue,  
14 Riverside, CA 92521, USA

15 <sup>5</sup>Lead Contact

16 †Denotes equal contribution

17 \*Correspondence: [benshahary@wustl.edu](mailto:benshahary@wustl.edu) (Y.B.)

18

19

20 **SUMMARY**

21 Optimal mating decisions depend on the robust coupling of signal production and  
22 perception because independent changes in either could carry a fitness cost. However,  
23 since the perception and production of mating signals are often mediated by different  
24 tissues and cell types, the mechanisms that drive and maintain their coupling remain  
25 unknown for most animal species. Here, we show that in *Drosophila*, sensory  
26 perception and production of an inhibitory mating pheromone are co-regulated by *Gr8a*,  
27 a member of the *Gustatory receptor* gene family. Specifically, we found that the  
28 pleiotropic action of *Gr8a* independently regulates the perception of pheromones by the  
29 chemosensory systems of males and females, as well as their production in the fat body  
30 and oenocytes of males. These findings provide a relatively simple molecular  
31 explanation for how pleiotropic receptors maintain robust mating signaling systems at  
32 the population and species levels.

33

34 **Keywords:** *Drosophila melanogaster*; Vinegar fly; Fruit fly; Cuticular hydrocarbons;  
35 *Gr8a*; Oenocyte.

## 36 INTRODUCTION

37 The majority of sexually-reproducing animals use intricate mating signaling systems,  
38 which rely on a robust physiological coupling between the production and perception of  
39 species-specific signals since any independent changes in either the signal or the  
40 capacity to sense it would carry a fitness cost (Boake, 1991; Brooks et al., 2005; Hoy et  
41 al., 1977; Shaw et al., 2011; Shaw and Lesnick, 2009; Steiger et al., 2011; Sweigart,  
42 2010; Symonds and Elgar, 2008; Wyatt, 2014). Previously published theoretical models  
43 have postulated that the maintenance of robust coupling between the production and  
44 perception of mating signals is driven by strong genetic linkage between the cellular and  
45 physiological processes that regulate mating-signal production and its perception, or  
46 alternatively, via the action of pleiotropic genes that control both processes (Boake,  
47 1991; Butlin and Ritchie, 1989; Butlin and Trickett, 1997; Shaw *et al.*, 2011; Shaw and  
48 Lesnick, 2009). Consequently, both mechanisms provide plausible explanations for how  
49 mating-signaling systems could remain stable and reliable at the population level while  
50 still retaining their capacity for future diversification, as necessitated for speciation  
51 (Chebib and Guillaume, 2021; Hoy *et al.*, 1977; Kirkpatrick and Hall, 2004; Lande, 1980;  
52 Shaw *et al.*, 2011; Shaw and Lesnick, 2009; Wiley et al., 2012).

53 Empirical data in support of the contribution of gene-linkage or pleiotropy to the  
54 maintenance of coupling between mating signal production and perception at the  
55 population level are rare (Chebib and Guillaume, 2021; Hoy *et al.*, 1977; Shaw *et al.*,  
56 2011; Shaw and Lesnick, 2009; Wiley *et al.*, 2012). Additionally, the complex  
57 characteristics of mating behaviors, and the species-specific signals that drive them,  
58 present a major barrier for identifying the actual molecular mechanisms and candidate  
59 pleiotropic genes that support the coupling between the production and perception of  
60 specific mating signals (Chenoweth and Blows, 2006; Singh and Shaw, 2012). How the  
61 functional coupling of the physiological processes responsible for the production and  
62 perception of mating signals remains robust is particularly puzzling since their  
63 perception is mediated by the peripheral sensory nervous system, while their production  
64 is restricted to specialized, non-neuronal pheromone producing cells (Chung and  
65 Carroll, 2015; Chung et al., 2014; McKinney et al., 2015). Notwithstanding, a previous  
66 *Drosophila* study has implied that the gene *desat1*, which encodes a fatty acid  
67 desaturase, directly contributes to both the perception and production of pheromones  
68 (Bousquet et al., 2012). However, subsequent studies have shown that *desat1*  
69 expression is enriched in central neurons, and that the effect of *desat1* mutations on the  
70 behavioral response to pheromones is not likely to be directly mediated via the  
71 modulation of pheromone perception by sensory neurons (Billeter et al., 2009).  
72 Furthermore, the effects of *desat1* mutations on the overall CHC profiles of both males  
73 and females are broad and lack specificity (Labeur et al., 2002). Together, these data  
74 suggest that *desat1* is not likely to act as a pleiotropic factor that directly couples the  
75 production and perception of mating pheromones in *Drosophila*. Consequently, the  
76 molecular identities of genes that may mediate the genetic and functional linkage  
77 between the production of insect mating pheromones by the coenocytes, and their  
78 perception by the chemosensory system, remained unknown.

79 Here we show that some pheromone-driven mating behaviors in *Drosophila* depend on  
80 the pleiotropic action of *Gr8a*, a member of the *Gustatory receptor* gene family (Lee et

81 al., 2012; Shim et al., 2015), which contributes to both the perception of inhibitory  
82 mating signals in pheromone-sensing neurons, and independently, to the production of  
83 inhibitory mating pheromones in non-neuronal abdominal pheromone-producing  
84 oenocytes. Together, these data provide a relatively simple molecular explanation for  
85 how genetic linkage could maintain functional coupling between the independent  
86 cellular and physiological processes that drive pheromone perception and production.

87

## 88 RESULTS

### 89 ***Some gustatory-like receptors exhibit enriched expression in abdominal tissues***

90 Similar to other insect species, *Drosophila* cuticular hydrocarbons (CHCs), or long-chain  
91 fatty acids synthesized by the fat body and oenocytes (Billeter *et al.*, 2009; Gutierrez et  
92 al., 2007), provide a hydrophobic desiccation barrier, as well as play an important role  
93 as pheromones in regulating diverse behaviors, including mating (Blomquist and  
94 Bagnères, 2010; Chung and Carroll, 2015; Ferveur, 2005; McKinney *et al.*, 2015).  
95 Specifically, complex blends of CHCs are often utilized by insects to communicate sex  
96 identity and female mating status, as well as to define the behavioral reproductive  
97 boundaries between closely related species (Ben-Shahar, 2015; Billeter *et al.*, 2009;  
98 Chung and Carroll, 2015; Chung *et al.*, 2014; Dweck et al., 2015; Lu et al., 2012; Lu et  
99 al., 2014; Yew and Chung, 2015).

100 While some of the genes and pathways that contribute to CHC synthesis in *Drosophila*  
101 are known (Blomquist and Bagnères, 2010; Chung *et al.*, 2014; Ferveur, 2005; Howard  
102 and Blomquist, 2005; McKinney *et al.*, 2015), the molecular identities of most CHC  
103 receptors remain unknown. Current models stipulate that the perception of volatile  
104 CHCs is mediated by olfactory sensory neurons (ORNs) located in the antennae and  
105 maxillary palps, while less volatile CHCs are sensed by specialized gustatory-like  
106 receptor neurons (GRNs) in the appendages (legs and wings), female genitalia, and the  
107 proboscis (Benton et al., 2007; Clowney et al., 2015; Datta et al., 2008; Koh et al., 2014;  
108 Kurtovic et al., 2007; Lebreton et al., 2014; Lu *et al.*, 2012; Lu *et al.*, 2014; Pikielny,  
109 2012; Thistle et al., 2012; Toda et al., 2012; van der Goes van Naters and Carlson,  
110 2007; Vijayan et al., 2014).

111 Consequently, we chose to examine members of the *Gustatory receptor* (*Gr*) gene  
112 family as candidate pleiotropic genes that might contribute to both the perception and  
113 production of pheromonal mating signals in *Drosophila*. Because several family  
114 members have already been implicated in the detection of specific excitatory and  
115 inhibitory pheromones (Bray and Amrein, 2003; Miyamoto and Amrein, 2008; Moon et  
116 al., 2009; Watanabe et al., 2011), and the majority of genes that encode family  
117 members are already known to be enriched in GRNs (Clyne et al., 2000; Dunipace et  
118 al., 2001; Scott et al., 2001; Wang et al., 2004), we reasoned that any pleiotropic *Gr*  
119 genes should be also expressed in the abdominal oenocytes (Billeter *et al.*, 2009). We  
120 tested this by using an RT-PCR screen, which revealed that 24 out of the 60 members  
121 of the *Gr* family are expressed in abdominal tissues of adult *Drosophila* (Table 1). This  
122 suggests that at least some *Gr* genes may contribute to both the perception and  
123 production of mating signals in *Drosophila*.

124

125 ***Gr8a* is a chemosensory receptor with sexually dimorphic expression in**  
126 **abdominal cells**

127 Although several members of the *Gr* gene family, including *Gr68a*, *Gr32a*, *Gr66a*,  
128 *Gr39a*, and *Gr33a*, were previously linked to the sensory perception of mating  
129 pheromones (Bray and Amrein, 2003; Lacaille et al., 2007; Miyamoto and Amrein, 2008;  
130 Moon et al., 2009; Watanabe et al., 2011), none of these candidate genes were  
131 identified in our initial RT-PCR screen for *Gr* genes expressed in abdominal tissues of  
132 either males or females (Table 1). However, *Gr8a*, which was indicated by our screen  
133 as being a male-specific abdomen-enriched receptor (Table 1) (Park and Kwon, 2011),  
134 was previously shown to play a role in the chemosensation of the non-proteinogenic  
135 amino acid L-Canavanine (Lee et al., 2012; Shim et al., 2015). Because our initial  
136 expression screen was based on whole-abdomen RNAs, we next used a GAL4  
137 transgenic driver to determine which abdominal cells express *Gr8a*. We found that, as  
138 was previously reported (Lee et al., 2012), *Gr8a* is expressed in 14-16 GRNs in the  
139 proboscis (Figure 1A-B), as well as in two paired GRNs in the pretarsus of the  
140 prothoracic legs in males (Figure 1C) and females (Figure 1D). We also observed *Gr8a*  
141 expression in abdominal oenocyte-like cells in males (Figure 1E) but not females  
142 (Figure 1F). The male-biased expression in the abdomen was further supported by  
143 qRT-PCR analysis (Figure 1G). These data further indicate that in addition to its  
144 chemosensory functions, *Gr8a* may also contribute to oenocyte physiology.

145 To further examine the spatial expression of *Gr8a* in males, we used a membrane  
146 bound GFP reporter to trace the axonal projection patterns of *Gr8a*-expressing GRNs in  
147 the prothoracic legs. We found that in contrast to the primary, sexually dimorphic *ppk23*-  
148 expressing pheromone-sensing GRNs (Lu et al., 2012; Lu et al., 2014; Thistle et al.,  
149 2012; Toda et al., 2012), the axons of tarsal *Gr8a*-expressing neurons ascend to the  
150 brain and do not cross the midline of the ventral nerve cord (VNC) in males (Figure 1H).  
151 Likewise, we found that *Gr8a*-expressing GRNs do not co-express the sex  
152 determination factor *fru* (Figure 1I) or the ion channel *ppk23* (Figure 1J), which are  
153 previously assumed to be expressed in all pheromone-sensing GRNs in the fly  
154 appendages. These data indicate that *Gr8a*-expressing GRNs in the prothoracic tarsal  
155 segments possibly represent a distinct subclass of pheromone-sensing GRNs.

156 In the male abdomen, we found that *Gr8a* is co-expressed with the oenocyte specific  
157 *desat1* driver (Billeter et al., 2009), as well as possibly in *desat1*-negative fat-body-like  
158 cells (Figure 1K-M). To better understand how *Gr8a* might function in non-neuronal  
159 oenocytes, we next characterized the subcellular localization of the native *Gr8a* protein  
160 in abdominal tissues, by using CRISPR/Cas9 genome editing to generate an  
161 endogenous GFP-tagged allele of *Gr8a*. Subsequently, immunohistochemical staining  
162 of abdominal tissues from *Gr8a*-GFP males with an anti-GFP antibody revealed that the  
163 receptor protein is enriched in vacuolar membranes in some oenocyte clusters (Figure  
164 1N). Together, these data indicate that in addition to its possible role in the perception of  
165 L-Canavanine, *Gr8a* also contributes to the perception, and possibly production, of  
166 mating pheromones in the male.

167

## 168 ***Gr8a* activity contributes to mating decisions in females**

169 We next hypothesized that if *Gr8a* is a pleiotropic gene that independently contributes to  
170 the production of a mating pheromone in males, and its chemosensory perception in  
171 females, then the knockdown of *Gr8a* in either males or females should have similar  
172 effects on female mating behavior. Therefore, we first investigated whether *Gr8a*, and  
173 the GRNs that express it, are required for sensory functions associated with female  
174 mate choice by using single-pair courtship assays (Lu *et al.*, 2012; Lu *et al.*, 2014). We  
175 found that blocking neuronal transmission in female *Gr8a*-expressing GRNs by the  
176 transgenic expression of tetanus toxin (TNT) shortens copulation latency relative to  
177 wild-type females, when courted by wild-type males (Figure 2A). Similarly, homozygous  
178 (Figure 2B) and hemizygous (Figure 2C) *Gr8a*-null females exhibited shorter copulation  
179 latencies when courted by wild type males, which can be rescued by driving the  
180 expression of the *Gr8a* cDNA by *Gr8a*-GAL4 (Figure 2D). In contrast, genetic  
181 manipulations of *Gr8a* did not affect male courtship behavior as measured by courtship  
182 latency and index towards wild-type females (Supplemental Figure 1). These data  
183 suggest that *Gr8a* is required for regulating female mating receptivity via the  
184 chemosensory detection of male-borne inhibitory mating pheromones.

185 Because *Gr8a* expression is specifically enriched in male oenocytes (Figure 1K-M), we  
186 next tested the hypothesis that *Gr8a* also plays a role in the production and/or release  
187 of inhibitory mating signals by males. We found that wild-type virgin females exhibited  
188 shorter copulation latencies towards *Gr8a* mutant males relative to wild-type controls  
189 (Figure 2E). These data indicate that the *Gr8a* mutant males produce and/or release  
190 lower levels of inhibitory mating pheromones relative to wild type controls. Together,  
191 these behavioral studies suggest that *Gr8a* is a pleiotropic gene that regulates both the  
192 production of an inhibitory mating signal in the male oenocytes, and its perception by  
193 the chemosensory system in females.

194

## 195 ***Gr8a* regulates the copulatory transfer, and the post-mating perception, of** 196 ***inhibitory pheromones by males***

197 Mating decisions in *D. melanogaster* rely on a balance between excitatory and inhibitory  
198 drives (Billeter *et al.*, 2009; Clowney *et al.*, 2015; Kallman *et al.*, 2015; Krupp *et al.*,  
199 2008; Laturney and Billeter, 2016). Therefore, male-borne inhibitory signals may help  
200 females optimize mate choices by delaying their decision to copulate with specific  
201 males. Additionally, previous studies showed that, in order to increase their fitness,  
202 *Drosophila* males transfer inhibitory mating pheromones to females during copulation,  
203 which subsequently lowers the overall attractiveness of mated females to other males  
204 (Averhoff and Richardson, 1974; Datta *et al.*, 2008; Jin *et al.*, 2008; Kurtovic *et al.*,  
205 2007; Miyamoto and Amrein, 2008; Yang *et al.*, 2009). We found that *Gr8a* mutant  
206 males were more likely to court mated females than wild-type controls (Figure 2F),  
207 suggesting that *Gr8a* is also required in males for the sensory recognition of the  
208 inhibitory signals that label the post-mating status of females. We also found that wild-  
209 type males failed to recognize the mating status of wild-type females that were  
210 previously mated with *Gr8a* mutant males (Figure 2F). These data indicate that *Gr8a* is  
211 also important for the production of inhibitory pheromones that are transferred from

212 males to females during copulation. Together, these findings suggest that *Gr8a* is  
213 responsible for the production and perception of transferrable inhibitory mating signals  
214 that advertise post-mating status in females. The simplest overall interpretation of these  
215 data is that *Gr8a* is a pleiotropic factor, which independently contributes to the  
216 production/ transfer of male inhibitory mating pheromones, as well as their sensory  
217 perception in both males and females.

218

### 219 ***Gr8a* contributes to quantitative and qualitative attributes of the pheromone** 220 **profiles of males and mated females**

221 Because our data indicate that the *Gr8a* mutation has a dramatic effect on the  
222 copulation latency of mated females and the ability of males to detect the mating status  
223 of females, we hypothesized that *Gr8a* is contributing to the production and/or transfer  
224 of an inhibitory pheromone in males. Therefore, we next examined whether the *Gr8a*  
225 mutation has a direct effect on qualitative and quantitative aspects of male and mated-  
226 female CHC profiles. We found that the overall CHC profile of *Gr8a* mutant males is  
227 both qualitatively (Figure 3A) and quantitatively different from that of wild-type males  
228 (Figure 3B-C and Table 2). In particular, the *Gr8a* mutation affects the levels of several  
229 alkenes and methyl-branched alkanes, which have been implicated in mate choice  
230 behaviors in diverse *Drosophila* species (Billeter *et al.*, 2009; Billeter and Levine, 2013;  
231 Chung and Carroll, 2015; Chung *et al.*, 2014; Dyer *et al.*, 2014; Shirangi *et al.*, 2009).

232 Although the exact mechanism by which *Gr8a* might be regulating the levels of specific  
233 CHCs remains unknown, we found that the expression levels of the desaturases *desat1*  
234 and *CG8630*, which play a role in the biosynthesis of alkenes (Chung and Carroll,  
235 2015), are affected by the *Gr8a* mutation in the male abdomen (Figure 3D). We also  
236 found that the overall qualitative aspects of the CHC profiles of wild-type females were  
237 not affected by mating with either *Gr8a* mutant or wild-type males (Figure 3E). However,  
238 quantitative analyses of individual CHCs revealed that nonacosane (C<sub>29</sub>) is higher in  
239 females that mated with *Gr8a* mutant males relative to those that mated with wild-type  
240 males (Figure 3F). Together, these data suggest that *Gr8a* action in oenocytes  
241 contributes to the production of some cuticular alkenes and methyl-branched alkanes in  
242 males, which possibly function as inhibitory mating pheromones.

243 Since the *Gr8a* mutation is not spatially restricted in *Gr8a* mutant males, it is possible  
244 that at least some of the effects of the *Gr8a* mutation on the pheromone profiles of  
245 males are indirectly mediated via its action in pheromone-sensing GRNs, instead of  
246 directly mediated via its action in oenocytes. Therefore, we next examined the effect of  
247 oenocyte-specific *Gr8a* knockdown on the production of male CHCs. We found that  
248 oenocyte-specific *Gr8a* RNAi knockdown in males leads to significant changes in their  
249 overall CHC profile relative to control males (Figure 3G). In contrast, fat-body-specific  
250 knockdown of *Gr8a* has no effect on the CHC profiles of males (Figure 3H). These data  
251 suggest that *Gr8a* is likely to play an oenocyte-specific role in the production of male  
252 CHCs. Together, our behavioral and pheromonal data indicate that *Gr8a* action  
253 contributes to mating decisions in females by co-regulating the perception of an  
254 inhibitory mating pheromone by females and males, as well as its production by males.  
255 This is consistent with a pleiotropic function for *Gr8a*.

256

### 257 ***Gr8a*-associated CHCs inhibit normal courtship behaviors**

258 To further characterize whether any of the individual CHCs regulated by *Gr8a* actually  
259 function as inhibitory mating pheromones, we tested the effect of perfuming naïve males  
260 with individual candidate CHCs on the copulation latency of wild-type females (Ben-  
261 Shahr et al., 2010; Ben-Shahr et al., 2007; Leitner and Ben-Shahr, 2020; Lu *et al.*,  
262 2012; Lu *et al.*, 2014). We found that wild-type females did not copulate with *Gr8a*  
263 mutant males that were perfumed with the alkenes 9-C<sub>25</sub>, 7-C<sub>25</sub>, and 7-C<sub>27</sub> (Figure 4A).  
264 Similarly, we found that wild-type males exhibited a longer courtship latency and lower  
265 courtship index towards wild-type females perfumed with 9-C<sub>25</sub> (Figure 4B-D), and  
266 exhibited longer copulation latency towards wild-type females perfumed with 7-C<sub>25</sub>  
267 (Figure 4E-G). In contrast, perfuming wild-type females with 7-C<sub>27</sub> had no effect on male  
268 courtship or female mating latency (Figure 4H-J). These data suggest that at least some  
269 of the CHCs regulated by *Gr8a* activity in the male oenocytes are inhibitory mating  
270 pheromones.

271

### 272 ***Variations in Gr8a contribute to species-specific male pheromonal profiles across*** 273 ***the Drosophila genus***

274 As populations diversify, pheromonal signals and their receptors often have to co-evolve  
275 to maintain behavioral species boundaries (Boake, 1991; Khallaf et al., 2021; Symonds  
276 and Elgar, 2008; Symonds and Wertheim, 2005). One possible mechanism for  
277 maintaining the functional coupling of coevolving signal-receptor pairs during speciation  
278 is pleiotropy (Boake, 1991; Shaw *et al.*, 2011; Singh and Shaw, 2012). Because our  
279 data suggest that *Gr8a* is a pleiotropic pheromone receptor, we tested the hypothesis  
280 that cross-species variations in the *Gr8a* coding sequence may have contributed to the  
281 rapid evolution of mating pheromones in the *Drosophila* species group (Khallaf *et al.*,  
282 2021; Shahandeh et al., 2018; Shirangi *et al.*, 2009). To test this hypothesis, we first  
283 performed a phylogenetic analysis of *Gr8a* orthologs across *Drosophila* species, which  
284 indicated that *Gr8a* is a conserved, sexually dimorphic receptor across the *Drosophila*  
285 genus (Figure 5A-B). Furthermore, alignment of *Gr8a* proteins across all the major  
286 *Drosophila* clades revealed that, in spite of its high overall sequence conservation, the  
287 *Gr8a* receptor has at least one phylogenetically variable domain (magenta frame, Figure  
288 5C), which includes the second intracellular and extracellular domains (Figure 5D).

289 Although the ligand-binding domains of the insect *Gr* gene family have not been  
290 identified yet, these data suggest that this phylogenetically variable protein domain in  
291 *Gr8a* may contribute to species-specific shifts in ligand-binding specificity and/or  
292 sensitivity across the *Drosophila* genus. Therefore, we next tested whether the  
293 transgenic rescue of the *Gr8a* null allele via ectopic expression of *Gr8a* cDNAs from  
294 different *Drosophila* species is sufficient to drive changes in the CHC profile of *D.*  
295 *melanogaster* males. By using a cross-species male mate-choice assay, we found that  
296 while *D. melanogaster* males are generally promiscuous, they do court *D. mojavensis*  
297 females at a significantly lower proportion than conspecific females. Because these  
298 assays are performed under red light, which eliminates visual mating cues, these data  
299 suggested that the lower sex drive towards *D. mojavensis* females is pheromone-



300 dependent (Figure 5E). Subsequently, we generated transgenic *D. melanogaster* lines  
301 which express either the *D. mojavensis* or the *D. melanogaster Gr8a* cDNAs driven by  
302 an oenocyte-specific GAL4 in the background of the *Gr8a* null allele. Comparison of  
303 male CHC profiles across the two genotypes revealed that rescuing the *Gr8a* mutation  
304 by *Gr8a* cDNAs from these two distantly related species resulted in significantly different  
305 male CHC profiles (Figure 5F). These data indicate that species-specific *Gr8a* coding  
306 variations are sufficient to drive differential CHC production by the male oenocytes, and  
307 suggest that pleiotropic pheromone receptors may have played a role in driving the  
308 rapidly evolving behavioral mating boundaries in *Drosophila*.

309

## 310 DISCUSSION

311 The data presented here demonstrate that *Gr8a* is a pleiotropic chemoreceptor that co-  
312 regulates the perception and production of an inhibitory pheromonal signal that plays an  
313 important role in mating behaviors of both *D. melanogaster* sexes. How *Gr8a*, a  
314 member of a canonical chemoreceptor family, might also contribute to the production of  
315 pheromonal signals is not obvious. In some better understood secretory cell types,  
316 autoreceptors are essential for the regulation of synthesis and secretion rates. For  
317 example, dopaminergic and serotonergic cells regulate rates of synthesis and release of  
318 their respective neuromodulators by the action of autoreceptors, which act via signaling  
319 feedback in response to changes in the extracellular concentrations of the secreted  
320 molecule (Ford, 2014; Stagkourakis et al., 2016). Therefore, one possible explanation  
321 for how *Gr8a* might regulate the synthesis and/or secretion of specific CHCs is by acting  
322 as an oenocyte-intrinsic autoreceptor, which regulates the synthesis of specific CHCs  
323 by providing feedback information about their levels in internal stores and/ or  
324 extracellularly (Figure 6).

325 Recent studies have indicated that *Drosophila* bitter receptor neurons typically express  
326 multiple *Gr* genes, and that bitter receptor ligand specificity is determined via  
327 combinatorial heteromeric receptor complexes (Dweck and Carlson, 2020; Shim et al.,  
328 2015; Sung et al., 2017). *Gr8a* is specifically required for the sensory perception of the  
329 feeding deterrent L-canavanine (Lee et al., 2012; Shim et al., 2015), but not for the  
330 detection of other bitter feeding deterrents such as caffeine, strychnine, and  
331 umbelliferone (Lee et al., 2009; Poudel et al., 2015). Our data indicate that similar to  
332 other *Drosophila* “bitter” taste receptors (Lacaille et al., 2007; Moon et al., 2009), *Gr8a*  
333 contributes to inhibitory sensory inputs in the contexts of both feeding and mating  
334 decisions. In the context of feeding, *Gr8a*-dependent perception of L-canavanine is  
335 mediated via its heterotrimeric interaction with *Gr66a* and *Gr98b* in bitter sensing  
336 neurons in the proboscis (Shim et al., 2015). However, although both *Gr66a* and *Gr98b*  
337 were also identified in our initial screen for receptors enriched in the adult abdomen, we  
338 found that *Gr66a* is expressed in both sexes and *Gr98b* is specifically enriched in  
339 females (Table 1). Therefore, we conclude that *Gr8a*-dependent contributions to  
340 sensory functions associated with mating decisions are independently driven via its  
341 heteromerization with different *Gr* genes than those that drive feeding-specific  
342 decisions.

343 Although we do not yet know the specific chemical identity of the ligand of *Gr8a*,  
344 previous studies indicated that at least two inhibitory mating pheromones, 11-cis-  
345 vaccenyl acetate (cVA) and CH503, are transferred from males to females during  
346 copulation. While our data suggest that the *Gr8a* mutation affects the level of cVA  
347 expressed by males, it is unlikely that either cVA or CH503 are the putative *Gr8a*  
348 ligands because the volatile cVA acts primarily via the olfactory receptor *Or67d* (Benton  
349 *et al.*, 2007; Datta *et al.*, 2008; Kurtovic *et al.*, 2007), and CH503 has been reported to  
350 signal via *Gr68a*-expressing neurons, which are anatomically distinct from the *Gr8a*  
351 GRNs we describe here (Figure 1A-B) (Shankar *et al.*, 2015; Yew *et al.*, 2009). Instead,  
352 our analyses of the effect of the *Gr8a* mutation on the CHC profile (Figure 3), and our  
353 results of the perfuming behavioral studies (Figure 4), suggest that the alkenes 5-C<sub>25</sub>, 7-  
354 C<sub>25</sub>, and 7-C<sub>27</sub>, which seem to act as inhibitory mating signals as well, are potentially the  
355 ligands of *Gr8a*.

356 Overall, our studies indicate that pleiotropic receptors, such as *Gr8a*, contribute to the  
357 physiological coupling between the production and perception of some mating  
358 pheromones by acting as both a sensory receptor in pheromone-sensing neurons, and  
359 possibly as an autoreceptor for the same chemical in the pheromone-producing  
360 oenocytes. Our finding that *Gr8a* is also a sexually dimorphic receptor that is conserved  
361 across the *Drosophila* genus, with at least one phylogenetically variable domain (Figure  
362 5A-C), suggests that it might also drive the divergence of mating signaling systems in  
363 association with rapid speciation. This is supported by our finding that rescuing the *Gr8a*  
364 mutation in *D. melanogaster* with a *Gr8a* cDNA from a distant species, *D. mojavensis*,  
365 leads to the development of a male CHC profile that is different from the profile of  
366 mutant males rescued with the *D. melanogaster Gr8a* cDNA (Figure 5F).

367 Studies in other animal species suggest that receptor pleiotropy likely plays a role in  
368 mating signaling via other sensory modalities including auditory communication in  
369 crickets (Heinen-Kay *et al.*, 2020; Hoy *et al.*, 1977; Wiley *et al.*, 2012) and visual  
370 communication in fish (Fukamachi *et al.*, 2009). While the specific genes and signaling  
371 pathways that mediate the coupling of the mating signals and their receptors in these  
372 mating systems remain mostly unknown, these data suggest that genetic linkage in  
373 signal-receptor pairs important for mating communication is likely to be more common  
374 than previously thought. Therefore, the genetic tractability of *D. melanogaster*, in  
375 combination with the diversity of mating communication systems in this species-rich  
376 phylogenetic group, provide a unique opportunity for understanding the evolution and  
377 mechanisms that drive and maintain the robustness of mating systems at the genetic,  
378 molecular, and cellular levels.

379

## 380 **ACKNOWLEDGMENTS**

381 We thank members of the Ben-Shahar lab for comments on earlier versions of the  
382 manuscript. We thank Joshua Krupp (University of Toronto) for assistance with  
383 perfuming studies, Nabeel Chowdhury and Deanna Simon for assistance with qRT-PCR  
384 analysis, and Paula Kiefel for technical help with generating transgenic flies. This work  
385 was supported by NSF grants 1322783, 1754264, and 1707221, and NIH grant  
386 NS089834 awarded to Y. B-S. Stocks obtained from the Bloomington *Drosophila* Stock

387 Center (NIH P40OD018537) were used in this study. Wild-type *Drosophila* species were  
388 obtained from the National *Drosophila* Species Stock Center at Cornell University.

389

### 390 **AUTHOR CONTRIBUTIONS**

391 K.M.Z., C.V., J.G.M. and Y.B-S designed experiments. K.M.Z., C.V., N.L., X.L., S.H.,  
392 J.G.M. and Y.B-S collected and analyzed data. K.M.Z., C.V., N.L. and Y.B-S wrote the  
393 manuscript.

394

### 395 **DECLARATION OF INTERESTS**

396 The authors declare no competing interests.

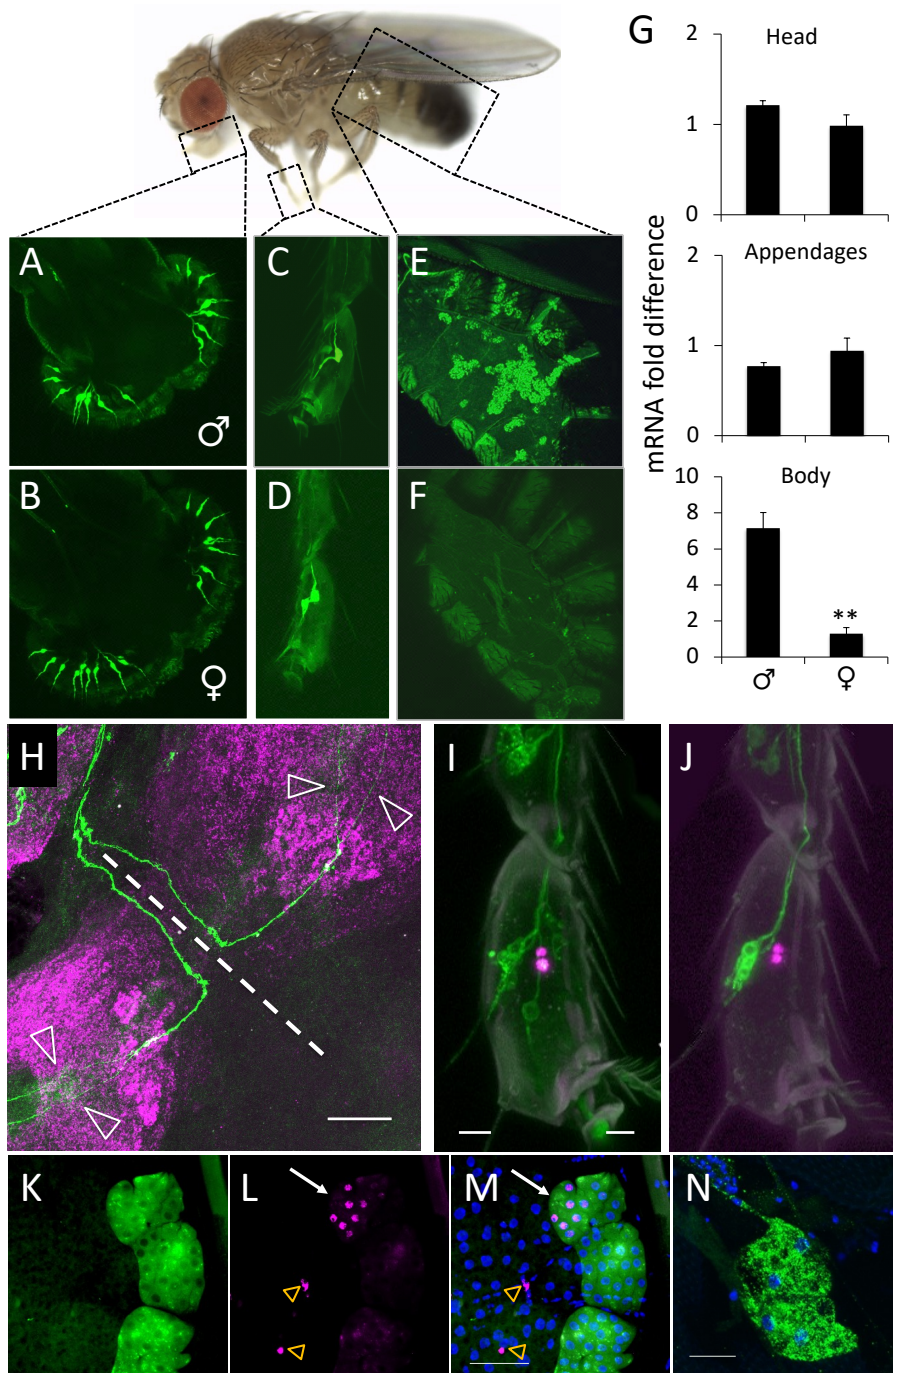

398

399

400

401

402

**Figure 1. *Gr8a* is a sexually dimorphic chemosensory receptor. (A-F) *Gr8a* is expressed in the proboscis (A-B) and prothoracic legs (C-D) of both males (top) and females (bottom), but is only expressed in the abdomen of males (E-F). Cells labeled by *Gr8a*-GAL4. (G) *Gr8a* has sexually dimorphic mRNA expression in the bodies of flies.**

403 Relative mRNA levels were measured by real-time quantitative RT-PCR. \*\*,  $p < 0.01$   
404 Mann Whitney Rank Sum Test,  $n = 3/\text{group}$ . **(H-J)** *Gr8a*-expressing GRNs represent a  
405 distinct subclass of pheromone sensing neurons. (H) Axonal projection patterns in the  
406 T1 VNC neuromere in a *Gr8a*-GAL4>UAS-CD8::GFP male (green). Arrowheads,  
407 individual axons; dashed line, midline of the VNC. Magenta, neuropil marker (nc82). (I)  
408 Confocal z-stack of a male *fruP1*-LexA>LexAop-myrGFP (green); *Gr8a*-GAL4>UAS-  
409 Red-Stinger (magenta) prothoracic leg. (J) Confocal z-stack of a male *ppk23*-  
410 LexA>LexAop-CD8::GFP (green); *Gr8a*-GAL4>UAS-Red-Stinger (magenta) prothoracic  
411 leg. **(K-M)** *Gr8a* is expressed in oenocytes and other abdominal cells. Confocal z-stack  
412 images of oenocytes in a *Gr8a*-GAL4>UAS-CD8::GFP; *desat1*>*luciferase* male: (K)  
413 *desat1* (green); (L) *Gr8a* (magenta); (M) Merge. Blue, DAPI. White arrow, expression of  
414 *Gr8a* in oenocytes; yellow arrows, expression of *Gr8a* in other abdominal cells. **(N)**  
415 GR8A protein is enriched in abdominal cells. Confocal z-stack of a GFP-tagged *Gr8a*  
416 allele in male abdominal cells; green, anti-GFP; blue, DAPI. Scale bars = 50 $\mu\text{m}$ .

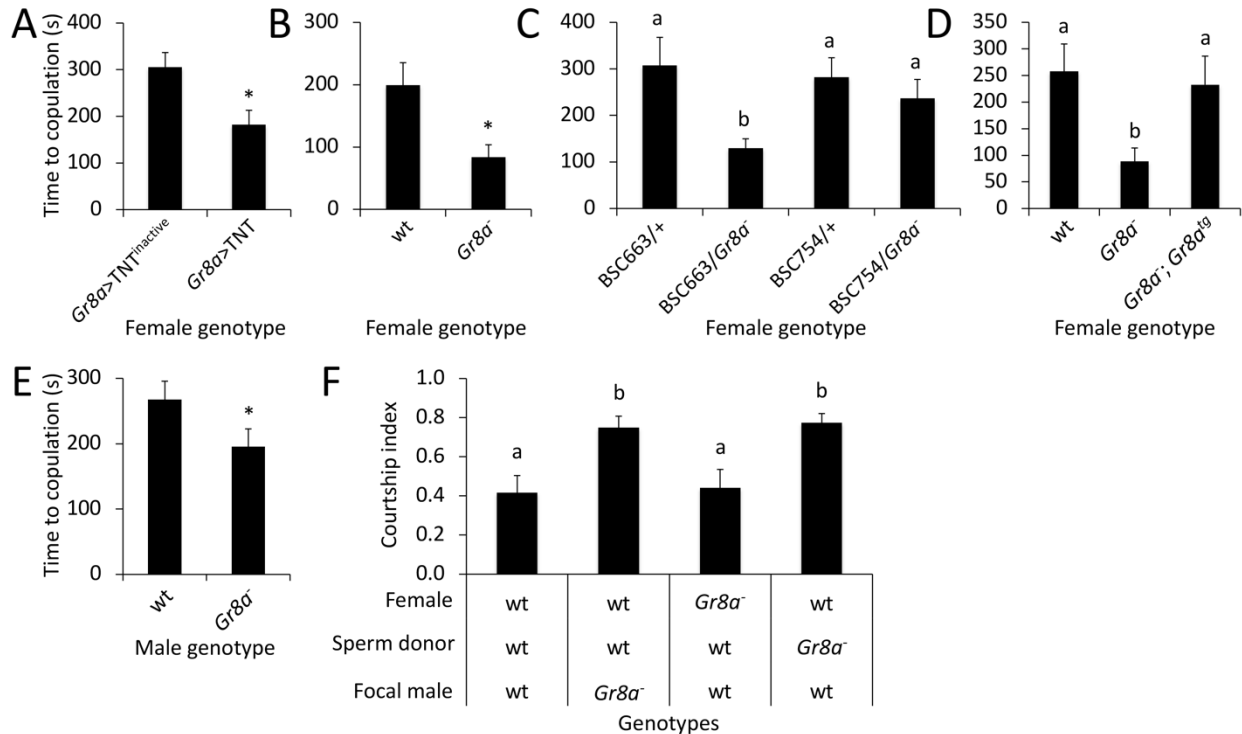

418  
 419 **Figure 2. *Gr8a* activity contributes to the perception and production of an**  
 420 **inhibitory signal associated with mating decisions in males and females. (A)**  
 421 **Blocking neural activity in female *Gr8a*-expressing sensory neurons (*Gr8a>TNT*)**  
 422 **shortens copulation latency relative to wild-type controls (*Gr8a>TNT<sup>inactive</sup>*). (B-C)**  
 423 **Homozygous (B) or hemizygous (C) *Gr8a* null females show shortened copulation**  
 424 **latency relative to wild-type controls. Df(1)BSC663 is a deficiency that covers the *Gr8a***  
 425 **locus. Df(1)BSC754 was used as a control. (D) Expression of *Gr8a* cDNA with the *Gr8a***  
 426 **promoter (*Gr8a<sup>-</sup>;Gr8a<sup>tg</sup>*) rescues the copulation latency phenotype in *Gr8a* mutant**  
 427 **females. (E) Wild-type females exhibit shortened copulation latency when courted by**  
 428 ***Gr8a* mutant males relative to wild-type males. (F) *Gr8a* mutant males do not recognize**  
 429 **the mating status of females, and have a reduced transfer of inhibitory mating**  
 430 **pheromones during copulations. Female, female genotype; Sperm donor, genotype of**  
 431 **males mated first with focal females; Focal male, genotypes of experimental males**  
 432 **presented with mated females. Different letters above bars indicate statistically**  
 433 **significant Tukey's HSD *post hoc* contrasts between groups. Panels C, D, and F: p<0.05**  
 434 **ANOVA, n>15/group. Panels A, B, E: \*, p<0.05, Mann Whitney Rank Sum Test,**  
 435 **n>15/group. All assays performed under red light conditions.**

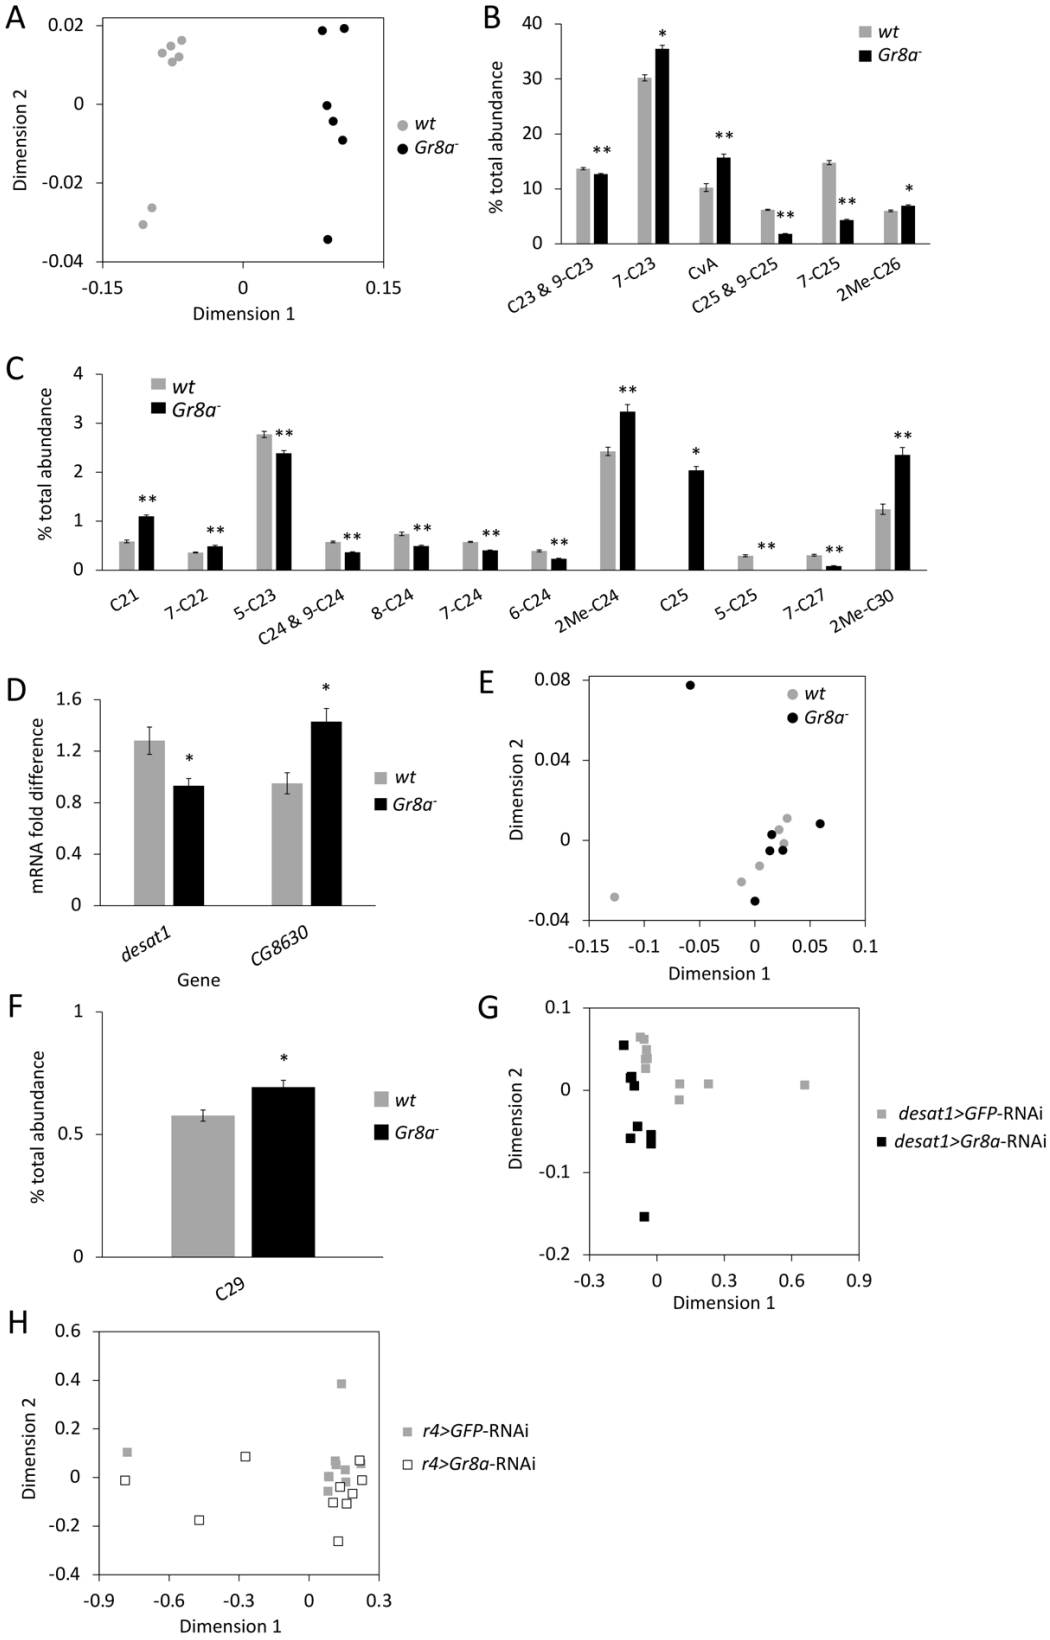

437 **Figure 3. The *Gr8a* mutation affects the pheromone profiles of males and mated**  
438 **females. (A)** Wild-type (wt) and *Gr8a* mutant (*Gr8a*<sup>-</sup>) males differ in CHC profile.  
439 p<0.001, Permutation MANOVA. **(B-C)** The *Gr8a* mutation affects the levels of  
440 individual CHCs in males. (B) CHCs found at high proportions in males. (C) CHCs found  
441 at low proportions in males. Only affected CHCs are shown. See Table 2 for the  
442 complete list. \*, p<0.05, \*\*, p<0.001, Student's t-test or Mann Whitney Rank Sum Test,  
443 n=6 (*Gr8a*<sup>-</sup>) or 7 (wt). **(D)** The *Gr8a* mutation affects the expression level of several  
444 desaturase genes. Only affected genes are shown. See Table 3 for the complete list. \*,  
445 p<0.05, Student's t-test, n=4/group. **(E)** Females mated with wild-type or *Gr8a* mutant  
446 males do not differ in CHC profile. p=0.570, Permutation MANOVA. **(F)** Nonacosane  
447 (C<sub>29</sub>) differs between females mated with wild-type and *Gr8a* mutant males. See Table 4  
448 for complete list of mated-female CHCs. \*, p<0.05, Student's t-test, n=6/group. **(G)**  
449 Control (*desat1* > *GFP*-RNAi) and oenocyte-specific *Gr8a* knockdown (*desat1* > *Gr8a*-  
450 RNAi) males differ in CHC profile. p<0.001, Permutation MANOVA. **(H)** Control (*r4* >  
451 *GFP*-RNAi) and fat body-specific *Gr8a* knockdown (*r4* > *Gr8a*-RNAi) males do not differ  
452 in CHC profile. p = 0.298, Permutation MANOVA. Panels A, E, G, and H depicted as  
453 Nonmetric Multidimensional Scaling (NMDS) plots with Bray-Curtis dissimilarity.

454



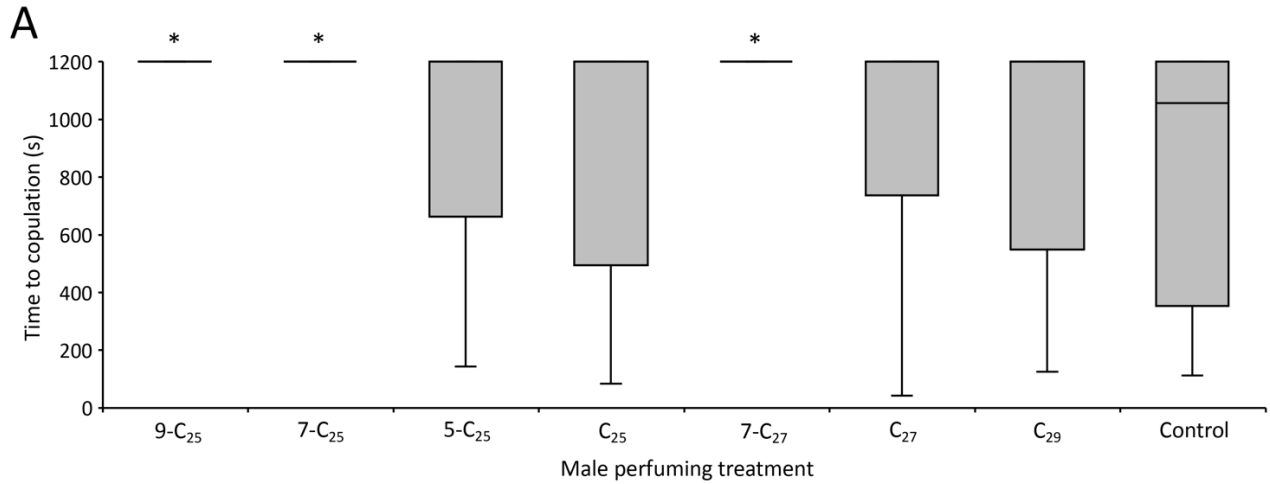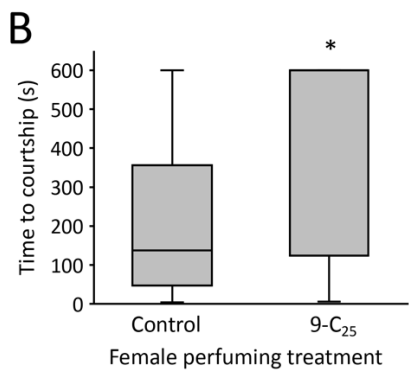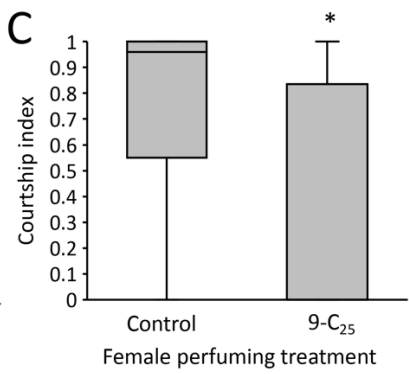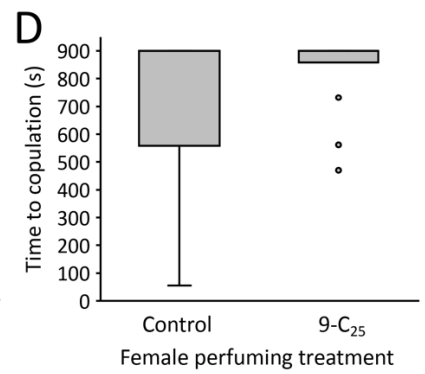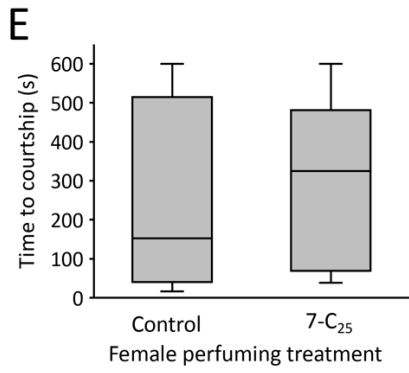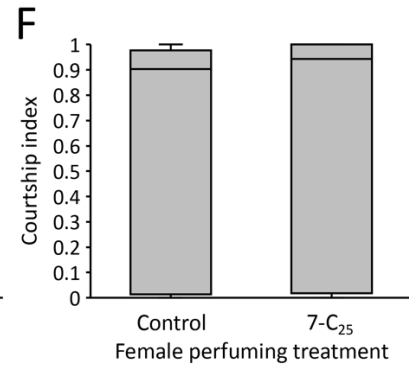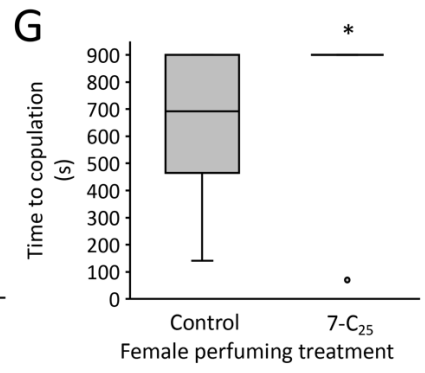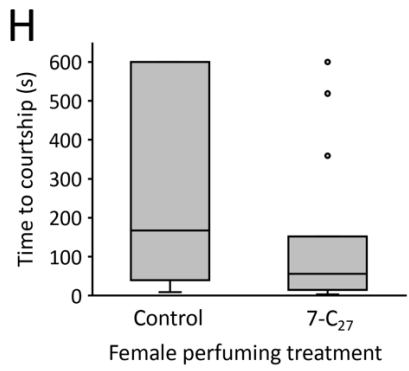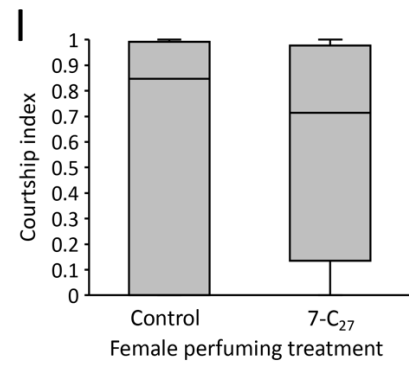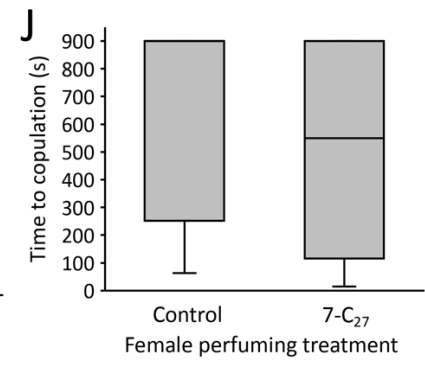

456 **Figure 4. *Gr8a*-associated alkenes inhibit normal courtship behaviors. (A)**  
457 Perfuming males with exaggerated amounts of several alkenes increases copulation  
458 latency compared to control males. **(B-D)** Perfuming females with 9-C<sub>25</sub> increases  
459 courtship latency (B), decreases courtship index (C), but does not affect copulation  
460 latency (D) compared to control females. **(E-G)** Perfuming females with 7-C<sub>25</sub> does not  
461 affect courtship latency (E) or index (F), but increases copulation latency (G) compared  
462 to control females. **(H-J)** Perfuming females with 7-C<sub>27</sub> does not affect courtship latency  
463 (H), courtship index (I), or copulation latency (J) compared to control females. Asterisks  
464 above bars indicate statistically significant contrasts compared to control flies, p<0.05,  
465 Kruskal-Wallis Test followed by Dunn's Test (A) or Mann Whitney Rank Sum Test (B-J),  
466 n=15/group.

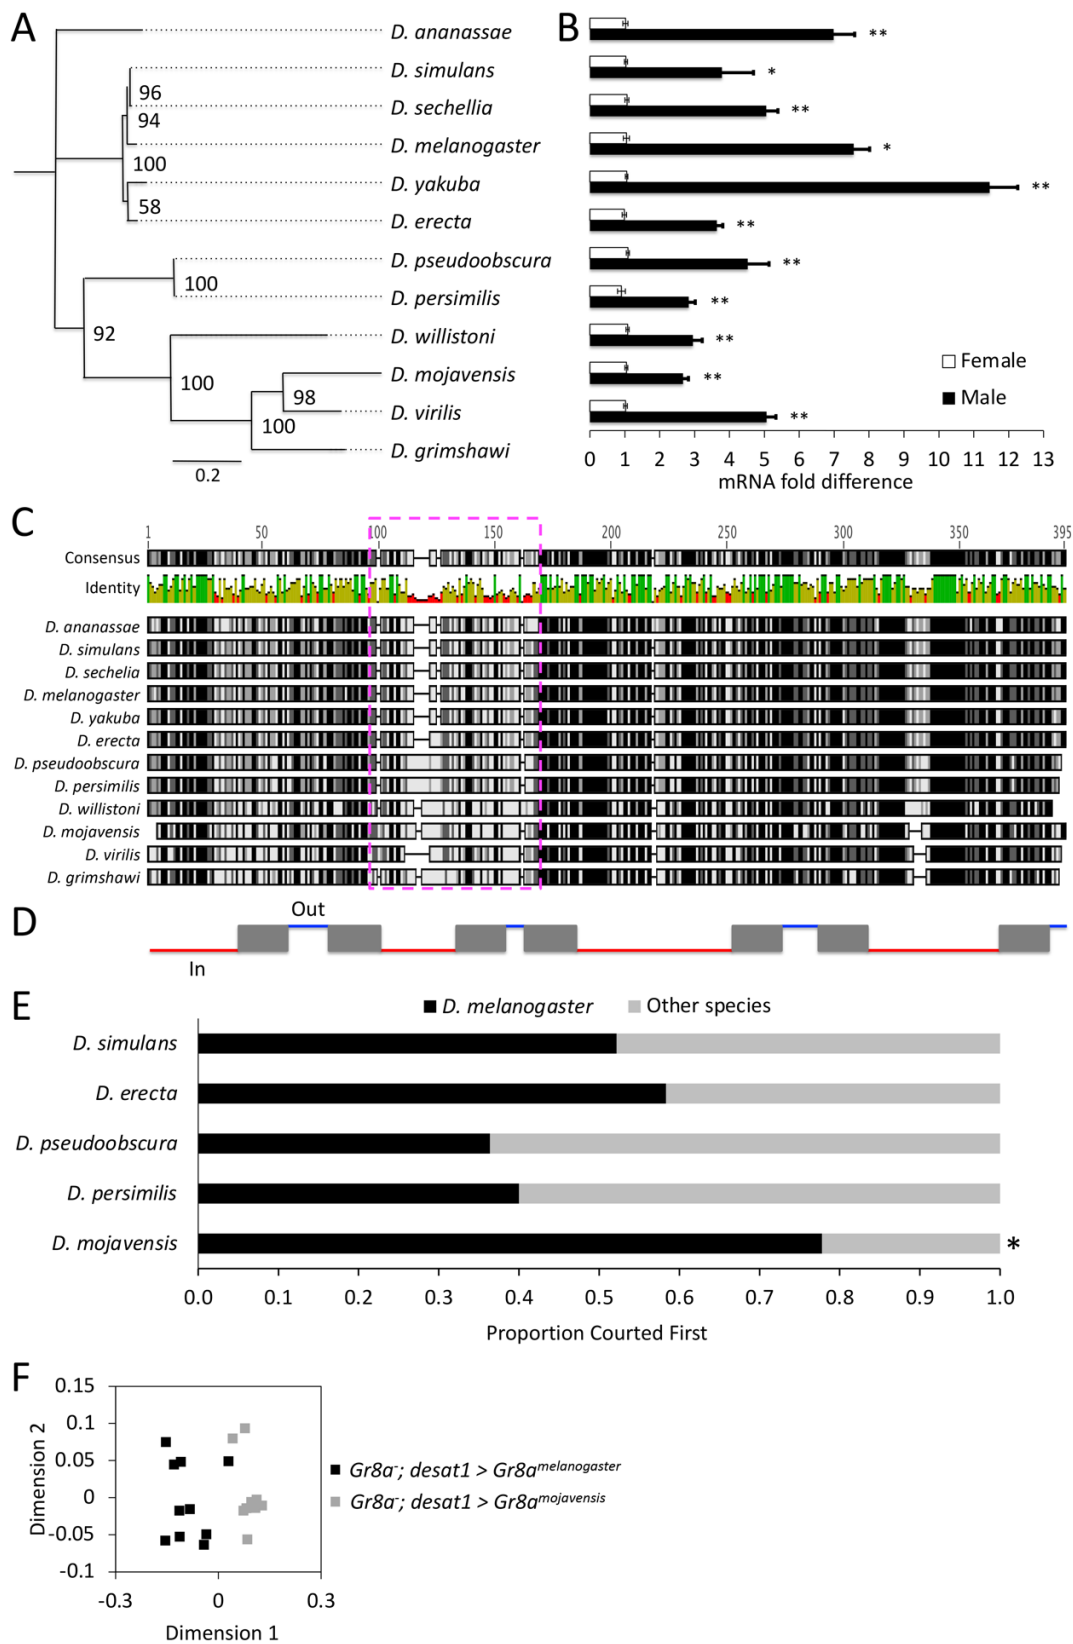

468 **Figure 5. Sexually dimorphic *Gr8a* expression across the *Drosophila* genus may**  
469 **contribute to species-specific differences in male CHC profiles. (A)** Phylogenetic  
470 tree of *Drosophila Gr8a* proteins. Substitution rate = 0.2. **(B)** *Gr8a* mRNA expression is  
471 enriched in males relative to females across *Drosophila*. Black, males; white, females. \*,  
472  $p < 0.05$ ; \*\*,  $p < 0.01$ ; Mann Whitney Rank Sum Test,  $n = 4/\text{group}$ . Live *D. grimshawi* was  
473 not analyzed because live specimens were not available at the *Drosophila* Species  
474 Stock Center (DSSC). **(C)** Multiple aligned amino acid sequences of *Gr8a* protein  
475 sequences from 12 species across *Drosophila*. The magenta dashed box highlights a  
476 putative hypervariable protein domain. Numbers on top of alignment indicate amino acid  
477 number. Black, 100% identical; Dark Gray, 80-100% similar; Light Gray, 60-80% similar;  
478 White, less than 60% similar (Blosum62 score matrix, threshold=1). Bars below  
479 consensus represent overall level of amino acid conservation. **(D)** *Gr8a* protein  
480 topology. Boxes, transmembrane domains; Red lines, intracellular domain; Blue lines,  
481 extracellular domains. **(E)** In female choice assays, *D. melanogaster* males court  
482 females from most other *Drosophila* species first at an equal proportion as *D.*  
483 *melanogaster* females, but court *D. mojavensis* females first at a lower proportion than  
484 *D. melanogaster* females. Assays performed under red light. \*,  $p < 0.05$ , Pearson's Chi-  
485 squared test. **(F)** *Gr8a* mutant *D. melanogaster* males with oenocyte-specific *D.*  
486 *melanogaster Gr8a* rescue differ in CHC profile from *Gr8a* mutant *D. melanogaster*  
487 males with oenocyte-specific *D. mojavensis Gr8a* rescue. Depicted as NMDS plot with  
488 Bray-Curtis dissimilarity; *Gr8a*<sup>-</sup>; *desat1* > *Gr8a*<sup>melanogaster</sup>, *D. melanogaster Gr8a*  
489 oenocyte rescue; *Gr8a*<sup>-</sup>; *desat1* > *Gr8a*<sup>mojavensis</sup>, *D. mojavensis Gr8a* oenocyte rescue.  
490 Bold letters in legend denote statistical significance,  $p < 0.05$ , permutation MANOVA.

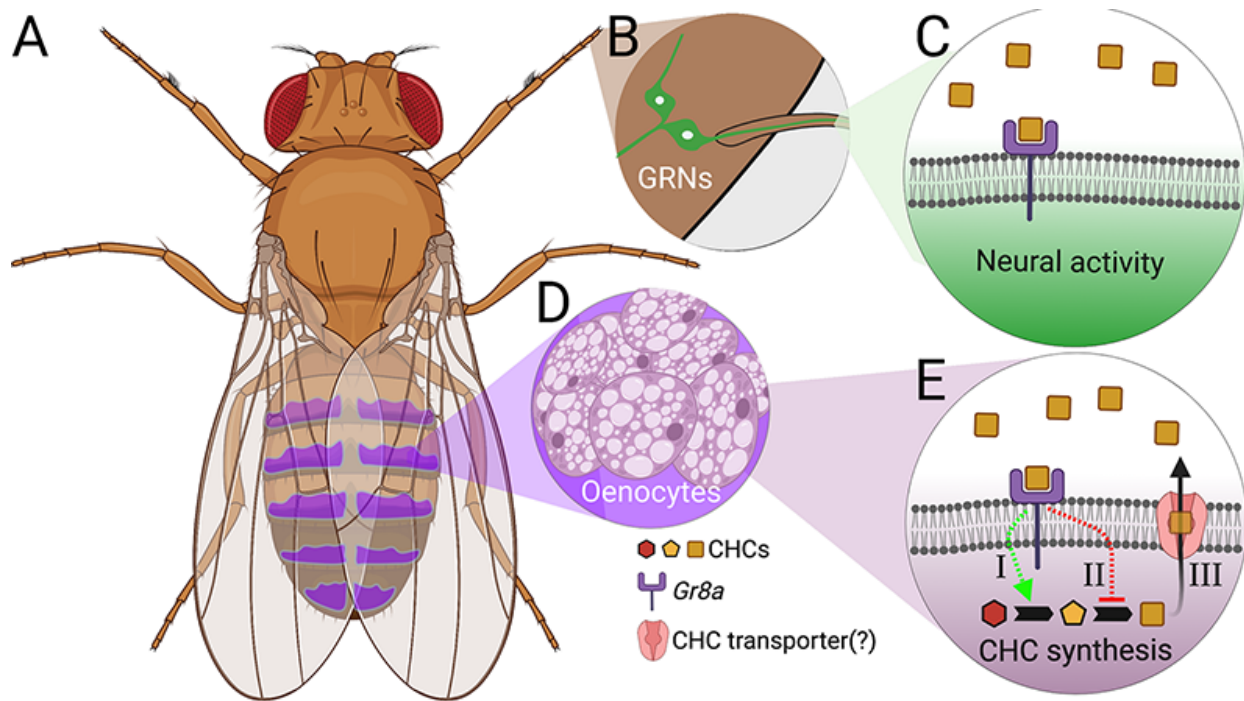

491

492

493

494

495

496

497

498

499

500

**Figure 6. Model for the pleiotropic action of *Gr8a* in the perception and production of pheromones.** (A) *Drosophila* male. The location of CHC-producing oenocytes is shown in magenta. (B) *Gr8a*-expressing GRNs are located at the last tarsal segment of the prothoracic legs. (C) *Gr8a* functions as an inhibitory pheromone receptor in a specific subset of leg GRNs. (D) Oenocytes are the primary CHC-producing cells in the male abdomen. (E) *Gr8a* functions as an autoreceptor in oenocytes, which regulates CHC synthesis [I-II] and/or CHC secretion [III] via signaling feedback loops.

501 **TABLES**

| <b>Gene</b>  | <b>Male</b> | <b>Female</b> |
|--------------|-------------|---------------|
| <i>Gr2a</i>  | -           | +             |
| <i>Gr8a</i>  | +           | -             |
| <i>Gr10a</i> | +           | +             |
| <i>Gr21a</i> | -           | +             |
| <i>Gr22a</i> | +           | -             |
| <i>Gr22e</i> | +           | +             |
| <i>Gr36c</i> | +           | -             |
| <i>Gr58c</i> | +           | +             |
| <i>Gr59a</i> | +           | +             |
| <i>Gr59b</i> | +           | +             |
| <i>Gr63a</i> | +           | -             |
| <i>Gr64a</i> | +           | -             |
| <i>Gr64b</i> | +           | +             |
| <i>Gr64c</i> | +           | +             |
| <i>Gr64d</i> | +           | -             |
| <i>Gr66a</i> | +           | +             |
| <i>Gr89a</i> | +           | +             |
| <i>Gr93a</i> | -           | +             |
| <i>Gr93d</i> | +           | +             |
| <i>Gr97a</i> | +           | +             |
| <i>Gr98a</i> | +           | +             |
| <i>Gr98b</i> | -           | +             |
| <i>Gr98c</i> | +           | +             |
| <i>Gr98d</i> | +           | +             |

502 **Table 1.** Candidate *Gr* genes expressed in male and/or female abdomens. Plus and  
503 minus signs indicate whether RT-PCR products were detected. Only genes with positive  
504 PCR products in at least one sex are shown.

| R.T.  | Compound                            | wt % total | <i>Gr8a</i> <sup>-</sup> % total | p value |
|-------|-------------------------------------|------------|----------------------------------|---------|
| 12.31 | C <sub>21</sub>                     | 0.589      | 1.102                            | <0.001  |
| 13.24 | Unknown                             | 0.071      | 0.191                            | <0.001  |
| 14.2  | C <sub>22</sub>                     | 0.893      | 0.949                            | 0.339   |
| 14.34 | 7-C <sub>22</sub>                   | 0.362      | 0.490                            | <0.001  |
| 15.25 | Unknown                             | 0.128      | 0.226                            | <0.001  |
| 16.22 | C <sub>23</sub> & 9-C <sub>23</sub> | 13.682     | 12.671                           | <0.001  |
| 16.4  | 7-C <sub>23</sub>                   | 30.201     | 35.478                           | 0.002   |
| 16.53 | 5-C <sub>23</sub>                   | 2.772      | 2.389                            | <0.001  |
| 16.71 | CvA                                 | 10.240     | 15.700                           | <0.001  |
| 18.03 | C <sub>24</sub> & 9-C <sub>24</sub> | 0.578      | 0.367                            | <0.001  |
| 18.19 | 8-C <sub>24</sub>                   | 0.742      | 0.493                            | <0.001  |
| 18.27 | 7-C <sub>24</sub>                   | 0.579      | 0.402                            | <0.001  |
| 18.37 | 6-C <sub>24</sub>                   | 0.395      | 0.233                            | <0.001  |
| 18.46 | 5-C <sub>24</sub>                   | 0.040      | 0.047                            | 0.943   |
| 19.09 | 2Me-C <sub>24</sub>                 | 2.426      | 3.240                            | <0.001  |
| 19.95 | C <sub>25</sub>                     | 0.000      | 2.038                            | 0.001   |
| 20.02 | C <sub>25</sub> & 9-C <sub>25</sub> | 6.195      | 1.793                            | <0.001  |
| 20.18 | 7-C <sub>25</sub>                   | 14.781     | 4.344                            | <0.001  |
| 20.42 | 5-C <sub>25</sub>                   | 0.296      | 0.000                            | <0.001  |
| 22.89 | 2Me-C <sub>26</sub>                 | 6.007      | 6.933                            | 0.002   |
| 23.7  | C <sub>27</sub>                     | 1.127      | 0.719                            | 0.052   |
| 23.94 | 7-C <sub>27</sub>                   | 0.308      | 0.083                            | <0.001  |
| 26.46 | 2Me-C <sub>28</sub>                 | 4.992      | 5.775                            | 0.078   |
| 27.25 | C <sub>29</sub>                     | 0.351      | 0.317                            | 0.574   |
| 29.89 | 2Me-C <sub>30</sub>                 | 1.245      | 2.353                            | <0.001  |

505 **Table 2.** Male CHCs. Retention time (R.T.), compound, percent total (% total), and p-  
506 value (Student's t-test or Mann Whitney Rank Sum Test) of each compound as part of  
507 the total pheromonal bouquet for wild-type (wt) and *Gr8a* mutant (*Gr8a*<sup>-</sup>) males.

| Gene           | wt mRNA fold difference | <i>Gr8a</i> <sup>-</sup> mRNA fold difference | p value |
|----------------|-------------------------|-----------------------------------------------|---------|
| <i>desat1</i>  | 1.282                   | 0.931                                         | 0.037   |
| <i>desat2</i>  | 1.413                   | 1.270                                         | 0.506   |
| <i>CG8630</i>  | 0.951                   | 1.429                                         | 0.012   |
| <i>CG9747</i>  | 0.838                   | 0.525                                         | 0.343   |
| <i>CG9743</i>  | 1.060                   | 0.959                                         | 0.373   |
| <i>CG15331</i> | 0.774                   | 1.000                                         | 0.21    |

508 **Table 3.** Desaturase gene expression. Relative mRNA expression of each desaturase  
509 gene for wild-type (wt) and *Gr8a* mutant (*Gr8a*<sup>-</sup>) males. Statistics via Student's t-test.



| <b>R.T.</b> | <b>Compound</b>                     | <b>WT % total</b> | <b><i>Gr8a</i> % total</b> | <b>p value</b> |
|-------------|-------------------------------------|-------------------|----------------------------|----------------|
| 12.31       | C <sub>21</sub>                     | 0.234             | 0.242                      | 0.712          |
| 14.2        | C <sub>22</sub>                     | 0.330             | 0.352                      | 0.512          |
| 14.34       | 7-C <sub>22</sub>                   | 0.029             | 0.029                      | 0.958          |
| 15.25       | Unknown                             | 0.238             | 0.200                      | 0.128          |
| 16.09       | C <sub>23</sub>                     | 6.481             | 6.580                      | 0.748          |
| 16.4        | 7-C <sub>23</sub>                   | 2.454             | 2.729                      | 0.149          |
| 16.39       | 7,11-C <sub>23</sub>                | 0.473             | 0.426                      | 0.208          |
| 16.53       | 5-C <sub>23</sub>                   | 0.254             | 0.235                      | 0.416          |
| 16.71       | CvA                                 | 1.349             | 1.135                      | 0.233          |
| 17.99       | C <sub>24</sub>                     | 0.660             | 0.732                      | 0.209          |
| 18.19       | 8-C <sub>24</sub>                   | 0.156             | 0.174                      | 0.334          |
| 19.09       | 2Me-C <sub>24</sub>                 | 1.214             | 1.104                      | 0.155          |
| 19.95       | C <sub>25</sub>                     | 5.404             | 5.683                      | 0.336          |
| 20.02       | C <sub>25</sub> & 9-C <sub>25</sub> | 3.141             | 3.851                      | 0.699          |
| 20.18       | 7-C <sub>25</sub>                   | 3.144             | 2.999                      | 0.422          |
| 20.25       | 7,11-C <sub>25</sub>                | 1.822             | 1.684                      | 0.315          |
| 20.42       | 5-C <sub>25</sub>                   | 0.526             | 0.555                      | 0.375          |
| 20.47       | 5,9-C <sub>25</sub>                 | 0.686             | 0.704                      | 0.589          |
| 22.89       | 2Me-C <sub>26</sub>                 | 10.010            | 9.247                      | 0.1554         |
| 23.7        | C <sub>27</sub>                     | 3.616             | 3.393                      | 0.24           |
| 23.8        | 9-C <sub>27</sub>                   | 2.498             | 2.739                      | 0.937          |
| 23.94       | 7-C <sub>27</sub>                   | 3.819             | 4.885                      | 0.24           |
| 24.1        | 7,11-C <sub>27</sub>                | 21.464            | 19.770                     | 0.18           |
| 24.28       | 5,9-C <sub>27</sub>                 | 2.557             | 2.438                      | 0.12           |
| 25.85       | 7,11-C <sub>28</sub>                | 0.658             | 0.645                      | 0.573          |
| 26.46       | 2Me-C <sub>28</sub>                 | 4.779             | 5.022                      | 0.306          |
| 27.25       | C <sub>29</sub>                     | 0.577             | 0.693                      | 0.01           |
| 27.7        | 7,11-C <sub>29</sub>                | 19.411            | 19.589                     | 0.824          |
| 29.89       | 2Me-C <sub>30</sub>                 | 1.359             | 1.465                      | 0.17           |
| 31.03       | 7,11-C <sub>31</sub>                | 0.562             | 0.606                      | 1              |

510 **Table 4.** Mated-female CHCs. Retention time (R.T.), compound, percent total (% total),  
511 and p-value (Student's t-test or Mann Whitney Rank Sum Test) of each compound as  
512 part of the total pheromonal bouquet for females mated with wild-type (wt) or *Gr8a*  
513 mutant (*Gr8a*<sup>-</sup>) males.

## 514 METHODS

515 **Animals.** Flies were maintained on a standard cornmeal medium under a 12:12 light-  
516 dark cycle at 25 Celsius. Unless specifically stated, the *D. melanogaster Canton-S (CS)*  
517 strain served as wild-type control animals. UAS-TNT-E, UAS-TNT-IMP-V1-A, UAS-  
518 mCD8::GFP, UAS-myr::GFP, UAS-Red Stinger, Df(1)BSC663, Df(1)BSC754, *Gr8a-*  
519 *GAL4*, *Gr8a*<sup>1</sup>, *desat1-Gal4*, *r4-Gal4* and *fruP1-LexA* fly lines were from the Bloomington  
520 Stock center. Originally in the *w*<sup>1118</sup> background, the *Gr8a*<sup>1</sup> null allele was outcrossed for  
521 six generations into the CS wild-type background, which was used as a control.  
522 Likewise, the *desat1-Gal4* allele was outcrossed for six generations into this *Gr8a null*  
523 background. *PromE(800)-GAL4* and *PromE(800)>Luciferase* were from Joel Levine  
524 (The University of Toronto, Canada). The following *Drosophila* species were obtained  
525 from the San Diego Stock Center: *D. simulans* 14011-0251.192, *D. sechellia* 14021-  
526 0248.03, *D. yakuba* 14021-0261.01, *D. erecta* 14021-0224.00, *D. ananassae* 14024-  
527 0371.16, *D. pseudoobscura* 14011-0121.104, *D. persimilis* 14011-0111.50, *D. willistoni*  
528 14030-0811.35, *D. mojavensis* 15081-1352.23, and *D. virilis* 15010-1051.118. The  
529 UAS-*Gr8a* transgenic lines were generated by cloning the *D. melanogaster* and *D.*  
530 *mojavensis Gr8a* cDNAs into pUAST-attB vector by using 5' EcoRI and 3' NotI  
531 restriction sites, followed by  $\Phi$ C31 integrase-dependent transgenesis at a Chromosome  
532 2 attP landing site (2L:1476459), as previously described (Zheng et al., 2014).  
533 Subsequently, both UAS-*Gr8a*<sup>CDNA</sup> lines were transgressed into the *Gr8a*<sup>1</sup> background,  
534 resulting in complete substitution of the endogenous *Gr8a* with expression of a *Gr8a*  
535 ortholog. The *ppk23-LexA* line was generated by integrating our previously described  
536 *ppk23* promoter DNA fragment (Lu et al., 2012) into the pBPnlsLexA::p65Uw plasmid  
537 (Pfeiffer et al., 2010), followed by  $\Phi$ C31 integrase-dependent transgenesis as above.

538 The GFP-tagged allele of *Gr8a* was generated via CRISPR/Cas9-dependent editing  
539 using a modified “scarless” strategy by using the sgRNA  
540 CGAGCAAGGCGGGAACGATT and a 3XP3>dsRed in the donor plasmid as a reporter  
541 for edited animals as previously described (Hill et al., 2017; Hill et al., 2019). Control  
542 lines with matching genetic backgrounds were established by selecting DsRed-negative  
543 injected animals. The final tagged *Gr8a* allele was generated by removing the DsRed  
544 cassette via the introduction of the *piggyBac* transposase (Hill et al., 2019).

545 **Immunohistochemistry.** To visualize the expression pattern of *Gr8a* in males and  
546 females, *Gr8a-GAL4* flies (Lee et al., 2012) were crossed to UAS-CD8::EGFP and live-  
547 imaged at 5 days old using a Nikon-A1 confocal microscope. To demonstrate *Gr8a*  
548 expression in oenocytes, abdomens from *Gr8a-GAL4/UAS-myr::GFP*;  
549 *PromE(800)>Luciferase* flies were dissected and immunostained as previously  
550 described (Lu et al., 2012; Zheng et al., 2014) by using a Rabbit anti-GFP (1:1000; A-  
551 11122, Thermo Fisher Scientific) and a mouse anti-luciferase (1:100; 35-6700, Thermo  
552 Fisher Scientific) antibodies followed by AlexaFluor 488 anti-rabbit and AlexaFluor 568  
553 anti-mouse secondary antibodies (Both at 1:1000; Thermo Fisher Scientific). To  
554 visualize the GR8A protein, abdomens of control flies and flies with CRISPR/Cas9  
555 generated GFP-tagged GR8A were dissected and immunostained as previously  
556 described (Lu et al., 2012; Zheng et al., 2014) using a Rabbit anti-GFP antibody  
557 (1:1000; A-11122, Thermo Fisher Scientific) followed by AlexaFluor 488 anti-rabbit  
558 secondary antibody (1:1000; Thermo Fisher Scientific).

559 **mRNA expression.** Newly eclosed flies were separated by sex under CO<sub>2</sub> and aged for  
560 5 days on standard cornmeal medium. On day 6, flies were placed in a -80°C freezer  
561 until RNA extraction. To separate body parts, frozen flies were placed in 1.5ml  
562 microcentrifuge tubes, dipped in liquid nitrogen, and then vortexed repeatedly until  
563 heads, appendages, and bodies were clearly separated. Total RNA was extracted using  
564 the Trizol Reagent (Thermo Fisher Scientific) separately from heads, bodies, and  
565 appendages for *Gr8a* expression and from bodies for desaturase enzyme genes.  
566 cDNAs were synthesized using SuperScript II reverse transcriptase (Thermo Fisher  
567 Scientific) with 500 ng total RNA in a 20 uL reaction. Real-time quantitative RT-PCR  
568 was carried out as previously described with *Rp49* as the loading control gene (Hill *et al.*,  
569 2017; Hill *et al.*, 2019; Lu *et al.*, 2012; Lu *et al.*, 2014; Zheng *et al.*, 2014). Primer  
570 sequences are described in Supplemental Tables 1-3.

571 **Courtship Behavior Assays.** Single-pair assays were performed as we have  
572 previously published (Lu *et al.*, 2012, 2014). In short, newly eclosed males were kept  
573 individually on standard fly food in plastic vials (12 x 75mm). Newly eclosed virgin  
574 females were kept in groups of 10 flies. All behaviors were done with 4-7 day-old  
575 animals, which were housed under constant conditions of 25° C and a 12h:12h light-  
576 dark cycle. Courtship was video recorded for 10 min for male courtship and 15 min for  
577 female mating receptivity. Male courtship latency and index were measured as  
578 previously described (Lu *et al.*, 2012; Lu *et al.*, 2014). Female receptivity index was  
579 defined as the time from the initiation of male courtship until copulation was observed.  
580 Unless otherwise indicated, assays were performed under normal light conditions.

581 Male mate-choice assays were performed in round courtship arenas. Briefly, one *D.*  
582 *melanogaster* virgin female and one interspecific virgin female was decapitated under  
583 CO<sub>2</sub> and placed in the arena. One virgin male *D. melanogaster* was then aspirated into  
584 the arena and behavior was video recorded for 10 minutes. The first female courted (by  
585 male wing extension) was noted. Male mate-choice assays were performed under red  
586 light conditions.

587 **Perfuming studies.** Synthetic compounds were synthesized by J.G.M. Perfuming  
588 studies were performed using a modified protocol from (Billeter *et al.*, 2009). In short, 3  
589 mg of each compound was dissolved in 6 mL hexane (Sigma-Aldrich #139386-500ML)  
590 and 0.5 mL was pipetted into individual 2 mL glass vials fitted with 9mm PTFE lined  
591 caps (Agilent Crosslab, Santa Clara, CA, USA). The hexane was evaporated under a  
592 nitrogen gas flow, such that a residue of the compound was left around the bottom one-  
593 third of the vial. Control vials were prepared using hexane without a spiked compound.  
594 Vials were kept at -20°C until use. Flies used in these trials were collected as described  
595 above, kept in single sex groups and aged for 4 days on standard cornmeal medium at  
596 25°C. 24 hours before perfuming, 20 flies of one or the other sex were placed in glass  
597 vials containing standard cornmeal medium (12 x 75mm). To perfume the flies, these  
598 groups of 20 flies were dumped without anesthesia into each 2 mL vial containing the  
599 compound of interest, and were vortexed at medium-low speed for 3 pulses of 20  
600 seconds punctuated by 20 second rest periods. Flies were transferred to new food vials  
601 and were allowed to recover for one hour. Perfumed flies were then used in courtship  
602 behavior assays as described above and the remaining flies were used in pheromone  
603 analyses to verify compound transfer. The genotype of flies that were perfumed differed

604 based upon the genotype with the lower amount of each compound as determined in  
605 Figure 3 (B, C, F). In all cases, compound transfer was verified by CHC extraction and  
606 GC/MS (Supplemental Table 4).

607 **Phylogenetic analysis.** Protein sequences of GR8A orthologs from the 12 sequenced  
608 *Drosophila* reference genomes were aligned by using the ClustalW algorithm in the  
609 Omega package (Sievers et al., 2011), followed by ProtTest (v2.4) to determine the best  
610 model of protein evolution (Abascal et al., 2005). Subsequently, Akaike and Bayesian  
611 information criterion scores were used to select the appropriate substitution matrix. We  
612 then used a maximum likelihood approach and rapid bootstrapping within RAxML v  
613 7.2.8 Black Box on the Cipres web portal to make a phylogenetic tree (Miller et al.,  
614 2010). Visualizations of the bipartition files were made using FigTree v1.3.1  
615 (<http://tree.bio.ed.ac.uk/software/figtree/>).

616 **Pheromone Analysis.** Virgin flies were collected upon eclosion under a light CO<sup>2</sup>  
617 anesthesia and kept in single-sex vials in groups of 10 with 6 biological replications for  
618 each genotype and sex. Virgin flies were aged for 5 days on standard cornmeal medium  
619 at 25°C. To collect mated flies, both females and males were aged for 3 days before  
620 single mating pairs were placed in a standard fly vial with standard cornmeal food for 24  
621 hours. The pair was then separated for 24 hours before collection. Copulation was  
622 confirmed by the presence of larvae in the vials of mated females several days later. On  
623 the morning of day 5, flies were anesthetized under light CO<sup>2</sup> and groups of five flies  
624 were placed in individual scintillation vials (VWR 74504-20). To extract CHCs, each  
625 group of flies was covered by 100 uL hexane (Sigma-Aldrich #139386-500ML)  
626 containing 50µg/mL hexacosane (Sigma-Aldrich #241687-5G) and was washed for ten  
627 minutes. Subsequently, hexane washes were transferred into a new 2 ml glass vial  
628 containing a 350 uL insert (Thermo Scientific C4000-LV-1W) and were stored at -20°C  
629 until shipment to the Millar laboratory.

630 Analyses of CHC profiles were done by gas chromatography and mass spectroscopy  
631 (GC-MS) in the Millar laboratory at UC Riverside as previously described (Chung et al.,  
632 2014). Peak areas were measured, and data was normalized to known quantity of  
633 internal standard hexacosane (Sigma-Aldrich #241687-5G). The relative proportion of  
634 each compound in each sample was calculated and used in further statistical analysis.

635 **Statistical Analysis.** All statistical analyses were performed in R (v 3.6.2). The  
636 following functions were used in the base statistics package: `t.test()` (t-test), `wilcox.test()`  
637 (Mann-Whitney Rank Sum Test), `aov()` (ANOVA), `TukeyHSD()` (Tukey's HSD post hoc  
638 test), `Kruskal.test()` (Kruskal-Wallis test), `chisq.test()` (Pearson's Chi-squared test).  
639 Kruskal-Wallis post hoc was performed using the `dunn.test.control` function in the  
640 PMCMR package (Pohlert, 2014). Qualitative CHC data were analyzed through a  
641 permutation MANOVA using the `adonis` function in the `vegan` package of R with Bray-  
642 Curtis dissimilarity measures (Oksanen, 2011). CHC profile data were visualized using  
643 non-metric multidimensional scaling (`metaMDS`) function in the `vegan` package of R  
644 (Oksanen, 2015) using Bray-Curtis dissimilarity, and either 2 or 3 dimensions in order to  
645 minimize stress to <0.1.

646

647

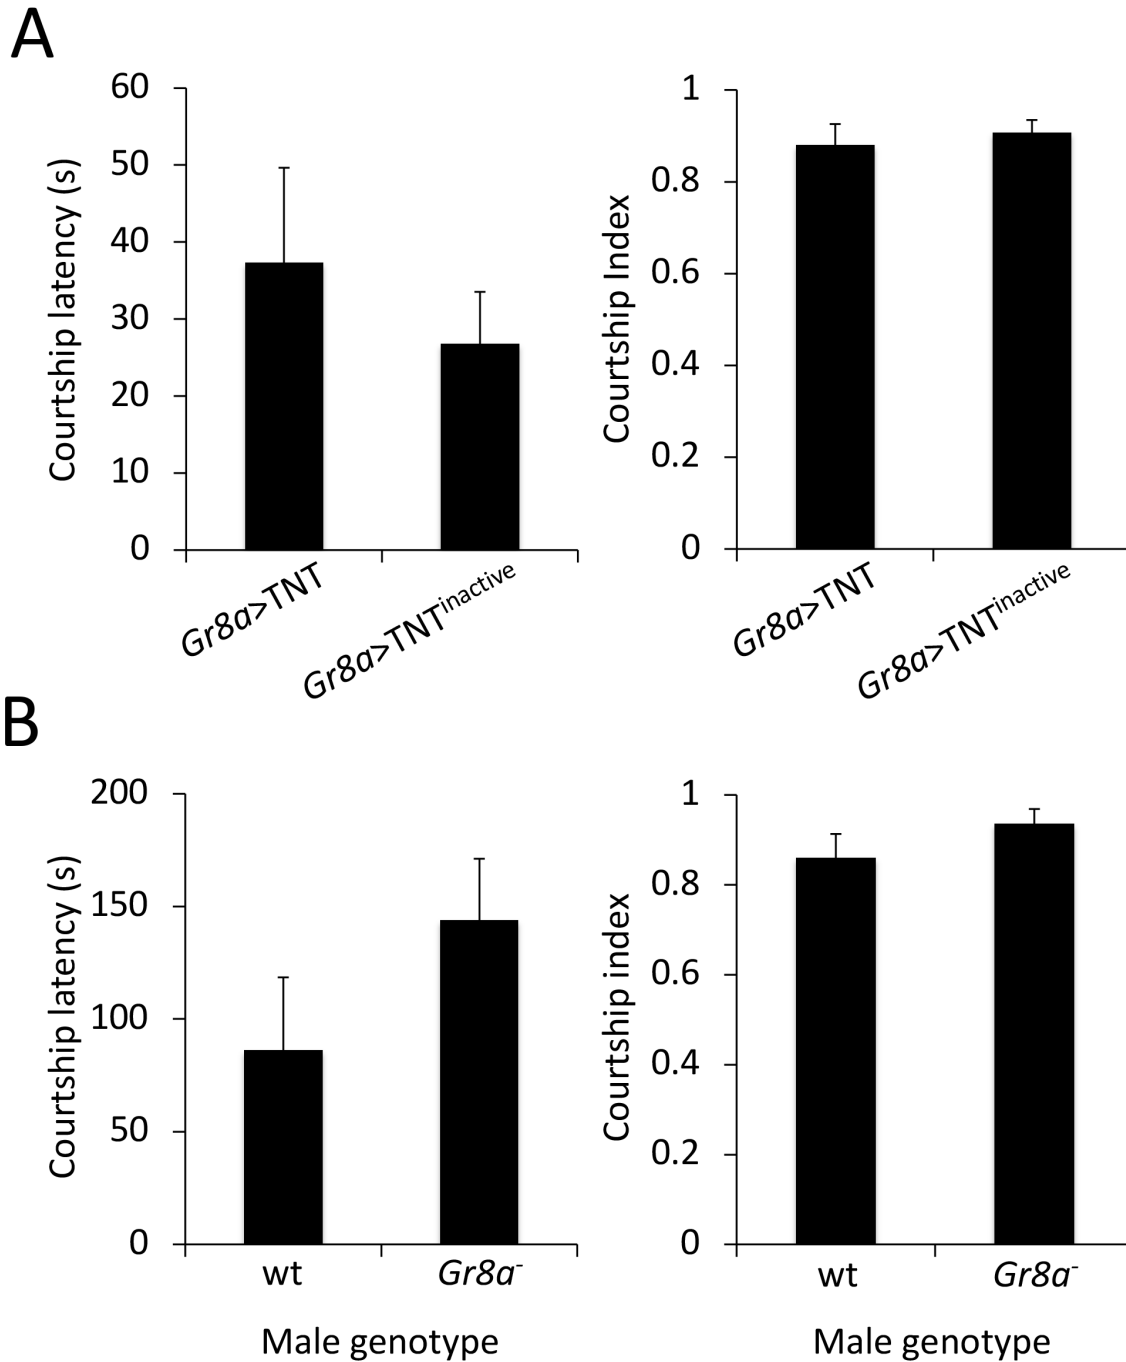

649

650 **Supplemental Figure 1.** *Gr8a* has no effect on male courtship latency or index toward  
 651 wild-type females. (A) Courtship latency (s) and index of control *Gr8a-gal4/UAS-IMP-*  
 652 *TNT-V1A* (*Gr8a>TNT<sup>inactive</sup>*) and *Gr8a-gal4/UAS-TNT-E* (*Gr8a>TNT*) mutant males  
 653 towards wild-type females. (B) Courtship latency (s) and index of wild-type (CS) and  
 654 *Gr8a null* (*Gr8a<sup>-</sup>*) males toward wild-type decapitated females. Mann Whitney Rank  
 655 Sum Test, not significant ( $p>0.05$ ),  $n=15$ /group.

| <b>Gene</b>  | <b>Forward Primer</b>    | <b>Reverse Primer</b>     |
|--------------|--------------------------|---------------------------|
| <i>Gr10a</i> | AGCGCGAGAGCTTTCGGATGC    | AAAGTCCACACAGCATGGGCGG    |
| <i>Gr10b</i> | GCGACTGTCCAGAGGATGTGGC   | CAGCTGATCAAAGCGAATGCGC    |
| <i>Gr21a</i> | AACTACCGGCTCGCCGATCG     | AGGTTGCCCCGTGGTCGATGA     |
| <i>Gr22a</i> | TGGGACCTTTGGCAGGGAATCG   | TGCGATGACTGCAGAAGAGGGT    |
| <i>Gr22b</i> | GGTTGTGCATTGCCGCATGCG    | CTGCAAAGCCAAGCGAACTCGT    |
| <i>Gr22c</i> | GCCGCCAGCGATCTAGCTGAG    | CAATGACCGCACAGCAATGCGA    |
| <i>Gr22e</i> | TGGTCTTCGTTCAAGCGCTGGT   | GCCGGCGATGGCTGCAGAATAAT   |
| <i>Gr22f</i> | GATCGCCTGCTGAAGCTGAGTGA  | GTGGGTGCACAGCCATGCGAAT    |
| <i>Gr23a</i> | AGCGATTTGTGGTGACCGCCA    | CATCCGCTGCCTCGCGTTGA      |
| <i>Gr28a</i> | TCGCCCTGCCGCACATCAATA    | GGGTGAGAGTTCCAAGGCGCT     |
| <i>Gr28b</i> | ACTGGAGGCATAGTGCACCTCCCT | AGTGGTCAAGGCCCCGCTGAT     |
| <i>Gr2a</i>  | TTTGCGACCGAACGGCCCAG     | GTTGAAGAAGCCAGCGGCGC      |
| <i>Gr32a</i> | ACACGGTCACCACCAACTGCT    | ACCAAGTATGTTGTGACGGCCGAA  |
| <i>Gr33a</i> | ATCGCCACGCACCCCTTACC     | GCTCACCACAAAGCAGGCCG      |
| <i>Gr36a</i> | GAGGTCGTGTCGTTGCAGCCC    | GTGCTCGCTGACGCCATCTGT     |
| <i>Gr36b</i> | TGGCATGCAAGGGCTTATGGCT   | CCGCAGTTGAGCCACGCGTG      |
| <i>Gr36c</i> | CGGCAGAGCAAACATGTTGCACG  | ACTGCAAGCCCAGTCCCAGGT     |
| <i>Gr39a</i> | TACCCCGAACC GGGACTGGG    | CCAGAGCGAAAAATCCATAAGCGGT |
| <i>Gr39b</i> | GGGCGCCA ACTGCACATTGG    | TCCAATCGAGGGATGGCAGGACA   |
| <i>Gr43a</i> | GCTGGCCCTGGCTCCATATGC    | AACCCCTTGTTCTTGGCTGCGGC   |
| <i>Gr47a</i> | GGTCGGGCCAGAGAAATCGGC    | CCCGCTTGGGATGGAGGGCC      |
| <i>Gr47b</i> | GCCCTGGGATCCCGAGTACG     | TGCCCCGATGTCAACTGGTGATCT  |
| <i>Gr57a</i> | GGCAAGGAGATGCCTTCGCCT    | GCCCATCTTCTGGGTCATGGCG    |
| <i>Gr58a</i> | TGTGGATGACGTGACGCGGA     | ACGGATGACAACGAAGGTGATCCGA |
| <i>Gr58b</i> | ACCTCCTGCAACAACACTGGCC   | CCGATTCTGCCTCAGCTGCATGG   |
| <i>Gr58c</i> | ACCGCTGTAAGTGGTTGGGACT   | TCCAACGATGTGCAGACGTCTCA   |
| <i>Gr59a</i> | GCCAAAGTTCTTCGCCCCCGA    | TCCAATCGCGTGCTGCTCTCG     |
| <i>Gr59b</i> | CAGCCAAGCACTCGTGAGTGA    | TGGCAAACCACATGCTGCGATT    |
| <i>Gr59c</i> | CCGAGTGCTGGCGGATCGAAC    | CTGGCCAGTTGCAGTTGGAAGT    |
| <i>Gr59d</i> | CGTCGATTGCTGGATCAACGCG   | TCGACCAA ACTCGAAAAGGCCG   |
| <i>Gr59e</i> | CCTCTCTGGGAGGAGTCCGTGC   | AGGGCAACGCCATTAGCGACT     |

|              |                        |                           |
|--------------|------------------------|---------------------------|
| <i>Gr59f</i> | GCCATGCACGTGGGAAAGGTGT | ACATTGCCCTGAACCGACTTGA    |
| <i>Gr5a</i>  | GCCTGCAACGTGCTCGTCCT   | TTGAGCGGGACAAGGCGCAG      |
| <i>Gr61a</i> | AAAGTGCGGGCGCCAGAAGCA  | GTGCGACCAGGAGCGAGCAA      |
| <i>Gr63a</i> | CGCAAGAAGGGTGACGCGGTG  | AAGGGTCCACTCAGGGAGCGC     |
| <i>Gr64a</i> | CGCGTGCAATTGGCTGCCTTG  | GTCCGCCGCCGTGAGGAATAC     |
| <i>Gr64b</i> | GCCCGCGGTCTTTTGGACAGA  | CATGGCCAGGACGAGTGAGCG     |
| <i>Gr64c</i> | ATGCACTGGCGCATCAGGCA   | CCGCCCTCGCAGAAGCTCTT      |
| <i>Gr64d</i> | ACCGCGCCTGGATGGTGTTC   | TGACCACGGCACCTTGCAT       |
| <i>Gr64e</i> | TGGCCACCACTTGCTCGCTG   | ACGCCGCGTGTAGCCGAAA       |
| <i>Gr64f</i> | TCTGGCTAGGCAGTGGCCCC   | GCATGGGCCACCGATGGCAT      |
| <i>Gr66a</i> | GAGGACCGCAGCCTAAAGGCC  | CGCGGTCAACTGGTCGGAGAC     |
| <i>Gr77a</i> | CGCAGTTCAGGCCGTCTGCTT  | CCACAGGCGCTGACGGCAAATA    |
| <i>Gr85a</i> | CTCTCGCCTACATGGCACGC   | ATAGTGACGTGCGTGTGCTGC     |
| <i>Gr89a</i> | GCTGCATGGAGTTCCCCTGACC | ACATTGCCAGTGGGCGTGAGC     |
| <i>Gr8a</i>  | ACATACGCATCGCCGTGGACTG | ATGTAGGTGCCACGGAACAGG     |
| <i>Gr92a</i> | TGTCTCCGTTGAGGGAGCGGT  | TGGGTGACATCGAATAGGCCCA    |
| <i>Gr93a</i> | GGTGAGGCAGTCAGAAGTGCC  | CCTCGGACGCCTCAAAGCCAC     |
| <i>Gr93b</i> | ACCACGCCATTCTGCGAAGAC  | GCCCAAAGGAAACACTCGCAGC    |
| <i>Gr93c</i> | TGCGACGCCTGAGTCTGGAGA  | CCCAAGGGTCTAACGCGAAACTCG  |
| <i>Gr93d</i> | ACTCGGGAACGTGCTCTGGAT  | AGAGGCCCAACAAGTTAACCCCTGA |
| <i>Gr97a</i> | TGCGTCGCTTCTGCGAGTTAGC | GCGTGCTGCAGATCGAATCGC     |
| <i>Gr98a</i> | GTTGAGCACACAAGGGTGGCTG | GCTGTTGCTTGCTGCTGCTCTGA   |
| <i>Gr98b</i> | TTGGAGGCTGGAGGGCGATGT  | ATGGTGACAAGCAACCCGCCA     |
| <i>Gr98c</i> | GCCAGGATTCAGGAGCTGTGCG | CGCTGGTATTTTGTCTGTAGCCGA  |
| <i>Gr98d</i> | CTGGCTGGACGCATTTGGGGC  | ATGTCAAAGAGGCCACCGCATGT   |
| <i>Gr9a</i>  | TGTCCTCTGTCTGGGCGACTGG | ACAAGGGACACGAACTGCAGGA    |

656  
657

**Supplemental Table 1.** Nucleotide sequences for qRT-PCR primers for *D. melanogaster Gr* genes.



| <b>Species</b>          | <b>Gr8a Forward Primer</b> | <b>Gr8a Reverse Primer</b> |
|-------------------------|----------------------------|----------------------------|
| <i>D. melanogaster</i>  | TGACCATCAACATACGCATCG      | CGTATATGAAGGCGGGAATCTC     |
| <i>D. simulans</i>      | GAACTTTTCGCTGCAACTCC       | ACTTCGGTATAAACTGGATGGTG    |
| <i>D. sechellia</i>     | GAGATTCCCGCCTTCATATACG     | GAGTTGCAGCGAAAAGTTCTG      |
| <i>D. erecta</i>        | CAGATTCAGAACTTTTTCGCTGC    | GGTGTAGATCATGTAGGTGCC      |
| <i>D. yakuba</i>        | TGCCTCGGACTAACAATTCTG      | GTGTAGATCATGTAGGTGCC       |
| <i>D. ananassae</i>     | AATGTACCGAAGTTTCCAGGG      | GCGGGTATGATCAGGAAATAGTC    |
| <i>D. pseudoobscura</i> | CCCGTTTCCGTGACAATATTG      | ACCATCTACATATCCGTTGCC      |
| <i>D. persimilis</i>    | TTTCGCTTCTCCACACTGAC       | AGGCGGGCAATATCAAAGAG       |
| <i>D. willistoni</i>    | GAAATGTTGCCCAGAATAGCC      | CCCAAAGCATGTATAACCACTG     |
| <i>D. virilis</i>       | TCTTCAGATCCAAAACCTTTTCGC   | TTGGGCATCAGTTGTACGG        |
| <i>D. mojavensis</i>    | CATATACCCGCCTTTCTCTACAC    | GTTCGTGCAGAATTTGTAGCG      |

| <b>Species</b>          | <b>Rp49 Forward Primer</b> | <b>Rp49 Reverse Primer</b> |
|-------------------------|----------------------------|----------------------------|
| <i>D. melanogaster</i>  | ATCTTGGGCCTGTATGCTG        | TGTGATGGGAATTCGTGGG        |
| <i>D. simulans</i>      | GTCGGATCGATATGCTAAGCTG     | CAGATACTGTCCCTTGAAGCG      |
| <i>D. sechellia</i>     | CATACAGGCCCAAGATCGTG       | CAGATACTGTCCCTTGAAGCG      |
| <i>D. erecta</i>        | GTCGGATCGATATGCTAAGCTG     | CAGATACTGTCCCTTGAAGCG      |
| <i>D. yakuba</i>        | CATACAGGCCCAAGATCGTG       | GGCATCAGATACTGTCCCTTG      |
| <i>D. ananassae</i>     | TACAGGCCCAAGATCGTTAAG      | GTA CTGACCCTTGAAGCGAC      |
| <i>D. pseudoobscura</i> | CCAGCTCCAAAATGACGATTC      | TCAATACCCTTAGGCTTGCG       |
| <i>D. persimilis</i>    | AAGCACTTCATCCGTCACC        | TCAATACCCTTAGGCTTGCG       |
| <i>D. willistoni</i>    | AAGCACTTCATCCGTCACC        | GTTGGGCATCAGATATTGGC       |
| <i>D. virilis</i>       | AGTCGGATCGTTATGCTAAGTTG    | TGGAGGGTACGCTTGTTTG        |
| <i>D. mojavensis</i>    | ACCATTTCGTCCAGCATAACAG     | TTGGCCCTTGAAGCGAC          |

658 **Supplemental Table 2.** Nucleotide sequences for qRT-PCR primers for *D.*  
659 *melanogaster* *Gr8a*, *Rp49* and orthologs.

| <b>Gene</b>    | <b>Forward Primer</b>  | <b>Reverse Primer</b>   |
|----------------|------------------------|-------------------------|
| <i>desat1</i>  | TTCTGAACGTAACCTGGCTG   | GGGAAGACGTGATGGTAGTTATG |
| <i>desat2</i>  | TTTACTGGAATGAGACGCTGG  | CTGGGTAGGATTCATGGTCTTG  |
| <i>Fad2</i>    | GTGCCTCAGTCTCAATCTCATC | GTGGTAGTTGTGGTATCCCTC   |
| <i>CG8630</i>  | ATGTGATGGCTAAGATCGGAC  | TGGTCGGAATGGCACTATTG    |
| <i>CG9747</i>  | TCAAGTGGGACAAAGTCATCC  | GCCGTA ACTCCGAATCCG     |
| <i>CG9743</i>  | GGTACTTCTGGAACGAGGATC  | TCAGTGGACATGAGGTTCTTG   |
| <i>CG15531</i> | CTCAAGGATGTGGATATGTCCG | ATGGAGGTGGCTAGGGAG      |
| <i>rp49</i>    | CACCAAGCACTTCATCCG     | TCGATCCGTAACCGATGT      |

660 **Supplemental Table 3.** Nucleotide sequences for qRT-PCR primers for *D.*  
661 *melanogaster* desaturase enzyme genes.

| Compound          | Genotype | Sex    | ng/sample | ng/fly |
|-------------------|----------|--------|-----------|--------|
| C <sub>25</sub>   | wt       | male   | 1350      | 270    |
| C <sub>25</sub>   | wt       | male   | 1170      | 234    |
| C <sub>25</sub>   | wt       | male   | 27730     | 5546   |
| 9-C <sub>25</sub> | Gr8a-    | male   | 67390     | 13478  |
| 9-C <sub>25</sub> | Gr8a-    | male   | 59380     | 11876  |
| 9-C <sub>25</sub> | Gr8a-    | male   | 1000      | 200    |
| 7-C <sub>25</sub> | Gr8a-    | male   | 43790     | 8758   |
| 7-C <sub>25</sub> | Gr8a-    | male   | 31330     | 6266   |
| 7-C <sub>25</sub> | Gr8a-    | male   | 24130     | 4826   |
| 5-C <sub>25</sub> | Gr8a-    | male   | 12050     | 2410   |
| 5-C <sub>25</sub> | Gr8a-    | male   | 14160     | 2832   |
| 5-C <sub>25</sub> | Gr8a-    | male   | 1870      | 374    |
| C <sub>27</sub>   | Gr8a-    | male   | 890       | 178    |
| C <sub>27</sub>   | Gr8a-    | male   | 720       | 144    |
| C <sub>27</sub>   | Gr8a-    | male   | 263       | 52.6   |
| 7-C <sub>27</sub> | Gr8a-    | male   | 36710     | 7342   |
| 7-C <sub>27</sub> | Gr8a-    | male   | 21250     | 4250   |
| 7-C <sub>27</sub> | Gr8a-    | male   | 15910     | 3182   |
| C <sub>29</sub>   | wt       | male   | 260       | 52     |
| C <sub>29</sub>   | wt       | male   | 340       | 68     |
| C <sub>29</sub>   | wt       | male   | 890       | 178    |
| 9-C <sub>25</sub> | wt       | female | 14060     | 2812   |
| 9-C <sub>25</sub> | wt       | female | 13830     | 2766   |
| 7-C <sub>25</sub> | wt       | female | 23200     | 4640   |
| 7-C <sub>25</sub> | wt       | female | 12780     | 2556   |
| 7-C <sub>27</sub> | wt       | female | 1010      | 202    |
| 7-C <sub>27</sub> | wt       | female | 1080      | 216    |

662 **Supplemental Table 4.** Amount (ng) of each perfumed compound measured in each  
663 sample of perfumed flies (5 flies per sample).

664  
665  
666

667 **Supplemental Data Legends:**

668 **Figure 1 Data:** Average qRT-PCR  $C_t$  scores across 3 technical replicates for each fly  
669 sample for *Gr8a* and *rp49* (control).

670

671 **Figure 2 Data:** Copulation latency (s) or courtship index of single-pair courtship trials  
672 corresponding to Figure 2.

673

674 **Figure 3 Data:** Amount (ng) of each compound extracted from each sample (5  
675 flies/sample) in Figure 3. Average qRT-PCR  $C_t$  scores across 3 technical replicates for  
676 each fly sample for every desaturase gene measured and *rp49* (control). Genes were  
677 run on separate qPCR plates, indicated by plate number in parentheses.

678

679 **Figure 4 Data:** Copulation latency (s) of single-pair courtship trials with perfumed  
680 males. Courtship latency (s), courtship index, and copulation latency (s) of single-pair  
681 courtship trials with perfumed females.

682

683 **Figure 5 Data:** Average qRT-PCR  $C_t$  scores across 3 technical replicates for each fly  
684 sample for *Gr8a* and *rp49* (control) across *Drosophila* species. Number of flies courted  
685 first by *D. melanogaster* males in choice assays. Amount (ng) of each compound  
686 extracted from each sample (5 flies/sample) in Figure 5.

687

688 **Figure S1 Data:** Courtship latency (s) and index of single-pair courtship trials  
689 corresponding to Supplemental Figure 1.

690

691

692

693 **REFERENCES**

- 694 Abascal, F., Zardoya, R., and Posada, D. (2005). ProtTest: selection of best-fit models  
695 of protein evolution. *Bioinformatics* 21, 2104-2105. bti263 [pii]  
696 10.1093/bioinformatics/bti263.
- 697 Averhoff, W.W., and Richardson, R.H. (1974). Pheromonal control of mating patterns in  
698 *Drosophila melanogaster*. *Behav Genet* 4, 207-225.
- 699 Ben-Shahar, Y. (2015). Editorial overview: Neuroscience: How nervous systems  
700 generate behavior: lessons from insects. *Current Opinion in Insect Science* 12, v-vii.  
701 10.1016/j.cois.2015.10.005.
- 702 Ben-Shahar, Y., Lu, B., Collier, D.M., Snyder, P.M., Schnizler, M., and Welsh, M.J.  
703 (2010). The *Drosophila* gene *CheB42a* is a novel modifier of Deg/ENaC channel  
704 function. *PLoS One* 5, e9395. 10.1371/journal.pone.0009395.
- 705 Ben-Shahar, Y., Nannapaneni, K., Casavant, T.L., Scheetz, T.E., and Welsh, M.J.  
706 (2007). Eukaryotic operon-like transcription of functionally related genes in *Drosophila*.  
707 *Proc Natl Acad Sci U S A* 104, 222-227. 10.1073/pnas.0609683104.
- 708 Benton, R., Vannice, K.S., and Vosshall, L.B. (2007). An essential role for a CD36-  
709 related receptor in pheromone detection in *Drosophila*. *Nature* 450, 289-293.  
710 10.1038/nature06328.
- 711 Billeter, J.C., Atallah, J., Krupp, J.J., Millar, J.G., and Levine, J.D. (2009). Specialized  
712 cells tag sexual and species identity in *Drosophila melanogaster*. *Nature* 461, 987-991.  
713 10.1038/nature08495.
- 714 Billeter, J.C., and Levine, J.D. (2013). Who is he and what is he to you? Recognition in  
715 *Drosophila melanogaster*. *Curr Opin Neurobiol* 23, 17-23. 10.1016/j.conb.2012.08.009.
- 716 Blomquist, G.J., and Bagnères, A.-G. (2010). *Insect hydrocarbons : biology,*  
717 *biochemistry, and chemical ecology* (Cambridge University Press).

718 Boake, C.R. (1991). Coevolution of senders and receivers of sexual signals: Genetic  
719 coupling and genetic correlations. *Trends Ecol Evol* 6, 225-227. 10.1016/0169-  
720 5347(91)90027-U.

721 Bousquet, F., Nojima, T., Houot, B., Chauvel, I., Chaudy, S., Dupas, S., Yamamoto, D.,  
722 and Ferveur, J.F. (2012). Expression of a desaturase gene, *desat1*, in neural and  
723 nonneural tissues separately affects perception and emission of sex pheromones in  
724 *Drosophila*. *Proc Natl Acad Sci U S A* 109, 249-254. 10.1073/pnas.1109166108.

725 Bray, S., and Amrein, H. (2003). A putative *Drosophila* pheromone receptor expressed  
726 in male-specific taste neurons is required for efficient courtship. *Neuron* 39, 1019-1029.

727 Brooks, R., Hunt, J., Blows, M.W., Smith, M.J., Bussiere, L.F., and Jennions, M.D.  
728 (2005). Experimental evidence for multivariate stabilizing sexual selection. *Evolution* 59,  
729 871-880. Doi 10.1111/J.0014-3820.2005.Tb01760.X.

730 Butlin, R.K., and Ritchie, M.G. (1989). Genetic coupling in mate recognition systems:  
731 what is the evidence? *Biological Journal of the Linnean Society* 37, 237-246.  
732 10.1111/j.1095-8312.1989.tb01902.x.

733 Butlin, R.K., and Trickett, A.J. (1997). Can Population Genetic Simulations Help to  
734 Interpret Pheromone Evolution? In *Insect Pheromone Research*, R.T. Cardé, and A.K.  
735 Minks, eds. (Springer US), pp. 548-562. 10.1007/978-1-4615-6371-6\_47.

736 Chebib, J., and Guillaume, F. (2021). Pleiotropy or linkage? Their relative contributions  
737 to the genetic correlation of quantitative traits and detection by multitrait GWA studies.  
738 *Genetics* 219. 10.1093/genetics/iyab159.

739 Chenoweth, S.F., and Blows, M.W. (2006). Dissecting the complex genetic basis of  
740 mate choice. *Nat Rev Genet* 7, 681-692. 10.1038/nrg1924.

741 Chung, H., and Carroll, S.B. (2015). Wax, sex and the origin of species: Dual roles of  
742 insect cuticular hydrocarbons in adaptation and mating. *Bioessays* 37, 822-830.  
743 10.1002/bies.201500014.

744 Chung, H., Loehlin, D.W., Dufour, H.D., Vaccarro, K., Millar, J.G., and Carroll, S.B.  
745 (2014). A single gene affects both ecological divergence and mate choice in *Drosophila*.  
746 *Science* 343, 1148-1151. 10.1126/science.1249998.

747 Clowney, E.J., Iguchi, S., Bussell, J.J., Scheer, E., and Ruta, V. (2015). Multimodal  
748 Chemosensory Circuits Controlling Male Courtship in *Drosophila*. *Neuron* 87, 1036-  
749 1049. 10.1016/j.neuron.2015.07.025.

750 Clyne, P.J., Warr, C.G., and Carlson, J.R. (2000). Candidate Taste Receptors in  
751 *Drosophila*. *Science* 287, 1830-1834. 10.1126/science.287.5459.1830.

752 Datta, S.R., Vasconcelos, M.L., Ruta, V., Luo, S., Wong, A., Demir, E., Flores, J.,  
753 Balonze, K., Dickson, B.J., and Axel, R. (2008). The *Drosophila* pheromone cVA  
754 activates a sexually dimorphic neural circuit. *Nature* 452, 473-477. nature06808 [pii]  
755 10.1038/nature06808.

756 Dunipace, L., Meister, S., McNealy, C., and Amrein, H. (2001). Spatially restricted  
757 expression of candidate taste receptors in the *Drosophila* gustatory system. *Curr Biol*  
758 11, 822-835. S0960-9822(01)00258-5 [pii].

759 Dweck, H.K., Ebrahim, S.A., Thoma, M., Mohamed, A.A., Keeseey, I.W., Trona, F.,  
760 Lavista-Llanos, S., Svatos, A., Sachse, S., Knaden, M., and Hansson, B.S. (2015).  
761 Pheromones mediating copulation and attraction in *Drosophila*. *Proc Natl Acad Sci U S*  
762 *A* 112, E2829-2835. 10.1073/pnas.1504527112.

763 Dweck, H.K.M., and Carlson, J.R. (2020). Molecular Logic and Evolution of Bitter Taste  
764 in *Drosophila*. *Curr Biol* 30, 17-30 e13. 10.1016/j.cub.2019.11.005.

765 Dyer, K.A., White, B.E., Sztepanacz, J.L., Bewick, E.R., and Rundle, H.D. (2014).  
766 Reproductive character displacement of epicuticular compounds and their contribution  
767 to mate choice in *Drosophila subquinaria* and *Drosophila recens*. *Evolution* 68, 1163-  
768 1175. 10.1111/evo.12335.

769 Ferveur, J.F. (2005). Cuticular hydrocarbons: their evolution and roles in *Drosophila*  
770 pheromonal communication. *Behav Genet* 35, 279-295. 10.1007/s10519-005-3220-5.

771 Ford, C.P. (2014). The role of D2-autoreceptors in regulating dopamine neuron activity  
772 and transmission. *Neuroscience* 282, 13-22. 10.1016/j.neuroscience.2014.01.025.

773 Fukamachi, S., Kinoshita, M., Aizawa, K., Oda, S., Meyer, A., and Mitani, H. (2009).  
774 Dual control by a single gene of secondary sexual characters and mating preferences in  
775 medaka. *BMC Biol* 7, 64. 10.1186/1741-7007-7-64.

776 Gutierrez, E., Wiggins, D., Fielding, B., and Gould, A.P. (2007). Specialized hepatocyte-  
777 like cells regulate *Drosophila* lipid metabolism. *Nature* 445, 275-280.  
778 10.1038/nature05382.

779 Heinen-Kay, J.L., Nichols, R.E., and Zuk, M. (2020). Sexual signal loss, pleiotropy, and  
780 maintenance of a male reproductive polymorphism in crickets. *Evolution* 74, 1002-1009.  
781 10.1111/evo.13952.

782 Hill, A., Zheng, X., Li, X., McKinney, R., Dickman, D., and Ben-Shahar, Y. (2017). The  
783 *Drosophila* Postsynaptic DEG/ENaC Channel ppk29 Contributes to Excitatory  
784 Neurotransmission. *J Neurosci* 37, 3171-3180. 10.1523/JNEUROSCI.3850-16.2017.

785 Hill, A.S., Jain, P., Folan, N.E., and Ben-Shahar, Y. (2019). The *Drosophila* ERG  
786 channel seizure plays a role in the neuronal homeostatic stress response. *PLoS Genet*  
787 15, e1008288. 10.1371/journal.pgen.1008288.

788 Howard, R.W., and Blomquist, G.J. (2005). ECOLOGICAL, BEHAVIORAL, AND  
789 BIOCHEMICAL ASPECTS OF INSECT HYDROCARBONS. *Annual Review of*  
790 *Entomology* 50, 371-393. 10.1146/annurev.ento.50.071803.130359.

791 Hoy, R.R., Hahn, J., and Paul, R.C. (1977). Hybrid cricket auditory behavior: evidence  
792 for genetic coupling in animal communication. *Science* 195, 82-84.  
793 10.1126/science.831260.

794 Jin, X., Ha, T.S., and Smith, D.P. (2008). SNMP is a signaling component required for  
795 pheromone sensitivity in *Drosophila*. *Proc Natl Acad Sci U S A* 105, 10996-11001.  
796 0803309105 [pii]  
797 10.1073/pnas.0803309105.



798 Kallman, B.R., Kim, H., and Scott, K. (2015). Excitation and inhibition onto central  
799 courtship neurons biases *Drosophila* mate choice. *eLife* 4. 10.7554/elife.11188.

800 Khallaf, M.A., Cui, R., Weissflog, J., Erdogmus, M., Svatos, A., Dweck, H.K.M.,  
801 Valenzano, D.R., Hansson, B.S., and Knaden, M. (2021). Large-scale characterization  
802 of sex pheromone communication systems in *Drosophila*. *Nat Commun* 12, 4165.  
803 10.1038/s41467-021-24395-z.

804 Kirkpatrick, M., and Hall, D.W. (2004). Sexual selection and sex linkage. *Evolution* 58,  
805 683-691. 10.1111/j.0014-3820.2004.tb00401.x.

806 Koh, T.W., He, Z., Gorur-Shandilya, S., Menuz, K., Larter, N.K., Stewart, S., and  
807 Carlson, J.R. (2014). The *Drosophila* IR20a clade of ionotropic receptors are candidate  
808 taste and pheromone receptors. *Neuron* 83, 850-865. 10.1016/j.neuron.2014.07.012.

809 Krupp, J.J., Kent, C., Billeter, J.C., Azanchi, R., So, A.K., Schonfeld, J.A., Smith, B.P.,  
810 Lucas, C., and Levine, J.D. (2008). Social experience modifies pheromone expression  
811 and mating behavior in male *Drosophila melanogaster*. *Curr Biol* 18, 1373-1383. S0960-  
812 9822(08)01034-8 [pii]  
813 10.1016/j.cub.2008.07.089.

814 Kurtovic, A., Widmer, A., and Dickson, B.J. (2007). A single class of olfactory neurons  
815 mediates behavioural responses to a *Drosophila* sex pheromone. *Nature* 446, 542-546.  
816 nature05672 [pii]  
817 10.1038/nature05672.

818 Labeur, C., Dallerac, R., and Wicker-Thomas, C. (2002). Involvement of *desat1* gene in  
819 the control of *Drosophila melanogaster* pheromone biosynthesis. *Genetica* 114, 269-  
820 274. 10.1023/a:1016223000650.

821 Lacaille, F., Hiroi, M., Twele, R., Inoshita, T., Umemoto, D., Manière, G., Marion-Poll, F.,  
822 Ozaki, M., Francke, W., Cobb, M., et al. (2007). An Inhibitory Sex Pheromone Tastes  
823 Bitter for *Drosophila* Males. *PLoS ONE* 2, e661. 10.1371/journal.pone.0000661.

824 Lande, R. (1980). The Genetic Covariance between Characters Maintained by  
825 Pleiotropic Mutations. *Genetics* 94, 203-215. 10.1093/genetics/94.1.203.

826 Laturney, M., and Billeter, J.C. (2016). *Drosophila melanogaster* females restore their  
827 attractiveness after mating by removing male anti-aphrodisiac pheromones. *Nat*  
828 *Commun* 7, 12322. 10.1038/ncomms12322.

829 Lebreton, S., Grabe, V., Omondi, A.B., Ignell, R., Becher, P.G., Hansson, B.S., Sachse,  
830 S., and Witzgall, P. (2014). Love makes smell blind: mating suppresses pheromone  
831 attraction in *Drosophila* females via Or65a olfactory neurons. *Scientific reports* 4, 7119.  
832 10.1038/srep07119.

833 Lee, Y., Kang, M.J., Shim, J., Cheong, C.U., Moon, S.J., and Montell, C. (2012).  
834 Gustatory receptors required for avoiding the insecticide L-canavanine. *J Neurosci* 32,  
835 1429-1435. 10.1523/JNEUROSCI.4630-11.2012.

836 Lee, Y., Moon, S.J., and Montell, C. (2009). Multiple gustatory receptors required for the  
837 caffeine response in *Drosophila*. *Proc Natl Acad Sci U S A* 106, 4495-4500.  
838 0811744106 [pii]  
839 10.1073/pnas.0811744106.

840 Leitner, N., and Ben-Shahar, Y. (2020). The neurogenetics of sexually dimorphic  
841 behaviors from a postdevelopmental perspective. *Genes Brain Behav* 19, e12623.  
842 10.1111/gbb.12623.

843 Lu, B., LaMora, A., Sun, Y., Welsh, M.J., and Ben-Shahar, Y. (2012). ppk23-Dependent  
844 chemosensory functions contribute to courtship behavior in *Drosophila melanogaster*.  
845 *PLoS Genet* 8, e1002587. 10.1371/journal.pgen.1002587.

846 Lu, B., Zelle, K.M., Seltzer, R., Hefetz, A., and Ben-Shahar, Y. (2014). Feminization of  
847 pheromone-sensing neurons affects mating decisions in *Drosophila* males. *Biology*  
848 *open* 3, 152-160. 10.1242/bio.20147369.

849 McKinney, R.M., Vernier, C., and Ben-Shahar, Y. (2015). The neural basis for insect  
850 pheromonal communication. *Curr Opin Insect Sci* 12, 86-92.  
851 10.1016/j.cois.2015.09.010.

852 Miller, M.A., Pfeiffer, W., and Schwartz, T. (2010). Creating the CIPRES Science  
853 Gateway for inference of large phylogenetic trees. 14-14 Nov. 2010. pp. 1-8.

854 Miyamoto, T., and Amrein, H. (2008). Suppression of male courtship by a *Drosophila*  
855 pheromone receptor. *Nat Neurosci* 11, 874-876. nn.2161 [pii]  
856 10.1038/nn.2161.

857 Moon, S.J., Lee, Y., Jiao, Y., and Montell, C. (2009). A *Drosophila* gustatory receptor  
858 essential for aversive taste and inhibiting male-to-male courtship. *Curr Biol* 19, 1623-  
859 1627. S0960-9822(09)01487-0 [pii]  
860 10.1016/j.cub.2009.07.061.

861 Oksanen, J. (2011). Multivariate analysis of ecological communities in R: vegan tutorial.  
862 R package version 1, 1-43.

863 Oksanen, J. (2015). Vegan: an introduction to ordination. URL <http://cran.r-project.org/web/packages/vegan/vignettes/introvegan.pdf> 8, 19.

865 Pfeiffer, B.D., Ngo, T.T., Hibbard, K.L., Murphy, C., Jenett, A., Truman, J.W., and Rubin,  
866 G.M. (2010). Refinement of tools for targeted gene expression in *Drosophila*. *Genetics*  
867 186, 735-755. 10.1534/genetics.110.119917.

868 Pikielny, C.W. (2012). Sexy DEG/ENaC channels involved in gustatory detection of fruit  
869 fly pheromones. *Sci Signal* 5, pe48. 10.1126/scisignal.2003555.

870 Pohlert, T. (2014). The pairwise multiple comparison of mean ranks package (PMCMR).

871 Poudel, S., Kim, Y., Kim, Y.T., and Lee, Y. (2015). Gustatory receptors required for  
872 sensing umbelliferone in *Drosophila melanogaster*. *Insect Biochem Mol Biol* 66, 110-  
873 118. 10.1016/j.ibmb.2015.10.010.

874 Scott, K., Brady, R., Jr., Cravchik, A., Morozov, P., Rzhetsky, A., Zuker, C., and Axel, R.  
875 (2001). A chemosensory gene family encoding candidate gustatory and olfactory  
876 receptors in *Drosophila*. *Cell* 104, 661-673. S0092-8674(01)00263-X [pii].

877 Shahandeh, M.P., Pischedda, A., and Turner, T.L. (2018). Male mate choice via  
878 cuticular hydrocarbon pheromones drives reproductive isolation between *Drosophila*  
879 species. *Evolution* 72, 123-135. 10.1111/evo.13389.

880 Shankar, S., Chua, J.Y., Tan, K.J., Calvert, M.E.K., Weng, R., Ng, W.C., Mori, K., and  
881 Yew, J.Y. (2015). The neuropeptide tachykinin is essential for pheromone detection in a  
882 gustatory neural circuit. *eLife* 4. 10.7554/elife.06914.

883 Shaw, K.L., Ellison, C.K., Oh, K.P., and Wiley, C. (2011). Pleiotropy, “sexy” traits, and  
884 speciation. *Behavioral Ecology* 22, 1154-1155.

885 Shaw, K.L., and Lesnick, S.C. (2009). Genomic linkage of male song and female  
886 acoustic preference QTL underlying a rapid species radiation. *Proc Natl Acad Sci U S A*  
887 106, 9737-9742. 10.1073/pnas.0900229106.

888 Shim, J., Lee, Y., Jeong, Y.T., Kim, Y., Lee, M.G., Montell, C., and Moon, S.J. (2015).  
889 The full repertoire of *Drosophila* gustatory receptors for detecting an aversive  
890 compound. *Nat Commun* 6, 8867. 10.1038/ncomms9867.

891 Shirangi, T.R., Dufour, H.D., Williams, T.M., and Carroll, S.B. (2009). Rapid evolution of  
892 sex pheromone-producing enzyme expression in *Drosophila*. *PLoS Biol* 7, e1000168.  
893 10.1371/journal.pbio.1000168.

894 Sievers, F., Wilm, A., Dineen, D., Gibson, T.J., Karplus, K., Li, W., Lopez, R.,  
895 McWilliam, H., Remmert, M., Söding, J., et al. (2011). Fast, scalable generation of high-  
896 quality protein multiple sequence alignments using Clustal Omega. *Molecular Systems*  
897 *Biology* 7.

898 Singh, N.D., and Shaw, K.L. (2012). On the scent of pleiotropy. *Proc Natl Acad Sci U S*  
899 *A* 109, 5-6. 10.1073/pnas.1118531109.

900 Stagkourakis, S., Kim, H., Lyons, D.J., and Broberger, C. (2016). Dopamine  
901 Autoreceptor Regulation of a Hypothalamic Dopaminergic Network. *Cell reports*.  
902 10.1016/j.celrep.2016.03.062.

903 Steiger, S., Schmitt, T., and Schaefer, H.M. (2011). The origin and dynamic evolution of  
904 chemical information transfer. *Proc Biol Sci* 278, 970-979. 10.1098/rspb.2010.2285.

905 Sung, H.Y., Jeong, Y.T., Lim, J.Y., Kim, H., Oh, S.M., Hwang, S.W., Kwon, J.Y., and  
906 Moon, S.J. (2017). Heterogeneity in the *Drosophila* gustatory receptor complexes that  
907 detect aversive compounds. *Nat Commun* 8, 1484. 10.1038/s41467-017-01639-5.

908 Sweigart, A.L. (2010). The genetics of postmating, prezygotic reproductive isolation  
909 between *Drosophila virilis* and *D. americana*. *Genetics* 184, 401-410.  
910 10.1534/genetics.109.111245.

911 Symonds, M.R., and Elgar, M.A. (2008). The evolution of pheromone diversity. *Trends*  
912 *Ecol Evol* 23, 220-228. 10.1016/j.tree.2007.11.009.

913 Symonds, M.R., and Wertheim, B. (2005). The mode of evolution of aggregation  
914 pheromones in *Drosophila* species. *J Evol Biol* 18, 1253-1263. 10.1111/j.1420-  
915 9101.2005.00971.x.

916 Thistle, R., Cameron, P., Ghorayshi, A., Dennison, L., and Scott, K. (2012). Contact  
917 Chemoreceptors Mediate Male-Male Repulsion and Male-Female Attraction during  
918 *Drosophila* Courtship. *Cell* 149, 1140-1151. S0092-8674(12)00523-5 [pii]  
919 10.1016/j.cell.2012.03.045.

920 Toda, H., Zhao, X., and Dickson, B.J. (2012). The *Drosophila* Female Aphrodisiac  
921 Pheromone Activates ppk23+ Sensory Neurons to Elicit Male Courtship Behavior. *Cell*  
922 *reports* doi:10.1016/j.celrep.2012.05.007, 599-607. 10.1016/j.celrep.2012.05.007.

923 van der Goes van Naters, W., and Carlson, J.R. (2007). Receptors and neurons for fly  
924 odors in *Drosophila*. *Curr Biol* 17, 606-612. S0960-9822(07)01020-2 [pii]  
925 10.1016/j.cub.2007.02.043.

926 Vijayan, V., Thistle, R., Liu, T., Starostina, E., and Pikielny, C.W. (2014). *Drosophila*  
927 pheromone-sensing neurons expressing the ppk25 ion channel subunit stimulate male  
928 courtship and female receptivity. *PLoS Genet* 10, e1004238.  
929 10.1371/journal.pgen.1004238.

930 Wang, Z., Singhvi, A., Kong, P., and Scott, K. (2004). Taste representations in the  
931 *Drosophila* brain. *Cell* 117, 981-991. 10.1016/j.cell.2004.06.011  
932 S009286740400577X [pii].

933 Watanabe, K., Toba, G., Koganezawa, M., and Yamamoto, D. (2011). *Gr39a*, a highly  
934 diversified gustatory receptor in *Drosophila*, has a role in sexual behavior. *Behav Genet*  
935 41, 746-753. 10.1007/s10519-011-9461-6.

936 Wiley, C., Ellison, C.K., and Shaw, K.L. (2012). Widespread genetic linkage of mating  
937 signals and preferences in the Hawaiian cricket *Laupala*. *Proc Biol Sci* 279, 1203-1209.  
938 10.1098/rspb.2011.1740.

939 Wyatt, T.D. (2014). *Pheromones and animal behavior : chemical signals and signatures*,  
940 Second edition. Edition (Cambridge University Press).

941 Yang, C.-h., Rumpf, S., Xiang, Y., Gordon, M.D., Song, W., Jan, L.Y., and Jan, Y.-N.  
942 (2009). Control of the Postmating Behavioral Switch in *Drosophila* Females by Internal  
943 Sensory Neurons. *Neuron* 61, 519-526.

944 Yew, J.Y., and Chung, H. (2015). Insect pheromones: An overview of function, form,  
945 and discovery. *Prog Lipid Res* 59, 88-105. 10.1016/j.plipres.2015.06.001.

946 Yew, J.Y., Dreisewerd, K., Luftmann, H., Muthing, J., Pohlentz, G., and Kravitz, E.A.  
947 (2009). A new male sex pheromone and novel cuticular cues for chemical  
948 communication in *Drosophila*. *Curr Biol* 19, 1245-1254. S0960-9822(09)01313-X [pii]  
949 10.1016/j.cub.2009.06.037.

950 Zheng, X., Valakh, V., DiAntonio, A., and Ben-Shahar, Y. (2014). Natural antisense  
951 transcripts regulate the neuronal stress response and excitability. *eLife* 3, e01849.  
952 10.7554/eLife.01849.
